# Supplementary material for: Toxic Cyanobacteria in Svalbard: Chemical Diversity of Microcystins Detected Using a Liquid Chromatography Mass Spectrometry Precursor Ion Screening Method
Source: MDPI journal article supplement (doi:10.3390/toxins10040147), 2018-04-03

# Supplementary Materials: Toxic cyanobacteria in Svalbard: Chemical diversity of microcystins detected using a liquid chromatography mass spectrometry precursor ion screening method

Julia Kleinteich, Jonathan Puddick, Susanna A. Wood, Falk Hildebrand, H. Dail Laughinghouse IV, David A. Pearce, Daniel R. Dietrich and Annick Wilmotte

## Environmental Sample SV-A

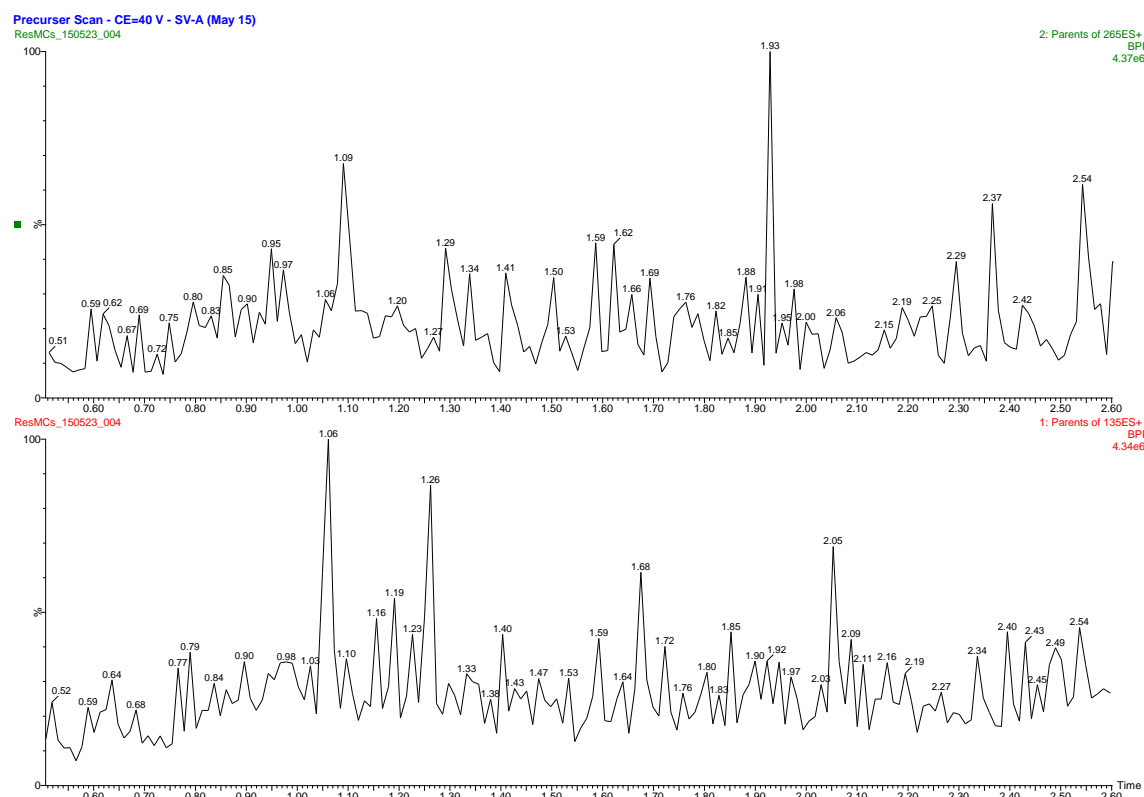

Base-peak chromatogram of the precursor ion scan for SV-A (CE=40 V).

| RT <sup>a</sup><br>(min) | Prod. <sup>b</sup> | m/z <sup>c</sup> | Mr <sup>d</sup><br>(Da) | Identity | Comments                                                                        |
|--------------------------|--------------------|------------------|-------------------------|----------|---------------------------------------------------------------------------------|
| 1.06                     | 135                | 744.4            | -                       | Unknown  | Unlikely to be a microcystin because of retention time in conjunction with m/z. |
| 1.09                     | 265                | 563.8            | -                       | Unknown  | Insufficient signal in MS/MS spectrum.                                          |
| 1.26                     | 135                | 461.6            | -                       | Unknown  | Unlikely to be a microcystin because of retention time in conjunction with m/z. |
| 1.68                     | 135                | 484.9            | -                       | Unknown  | Unlikely to be a microcystin because of retention time in conjunction with m/z. |
| 1.93                     | 265                | 733.5            | -                       | Unknown  | Unlikely to be a microcystin because of retention time in conjunction with m/z. |
| 2.05                     | 135                | 645.0            | -                       | Unknown  | Unlikely to be a microcystin because of retention time in conjunction with m/z. |

<sup>a</sup> RT = Retention time on a Waters Acquity BEH-C<sub>18</sub> UPLC column (2.1×50 mm; 1.7-μm). <sup>b</sup> Product ion trace in which the precursor ion was identified (m/z 135 for Adda-containing compounds or m/z 265 for ADMAAdda-containing compounds). <sup>c</sup> m/z = Mass-to-charge ratio of precursor ion. <sup>d</sup> Mr = Molecular weight of the identified precursor ion.

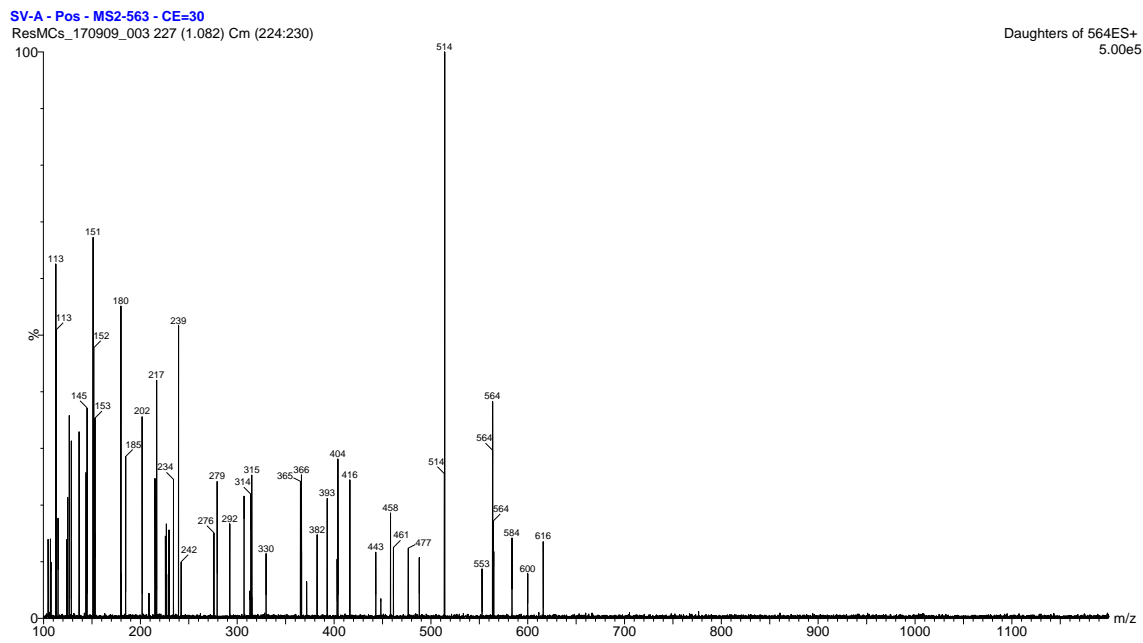

## Environmental Sample SV-B

Svalbard Parent Scan - SV-B

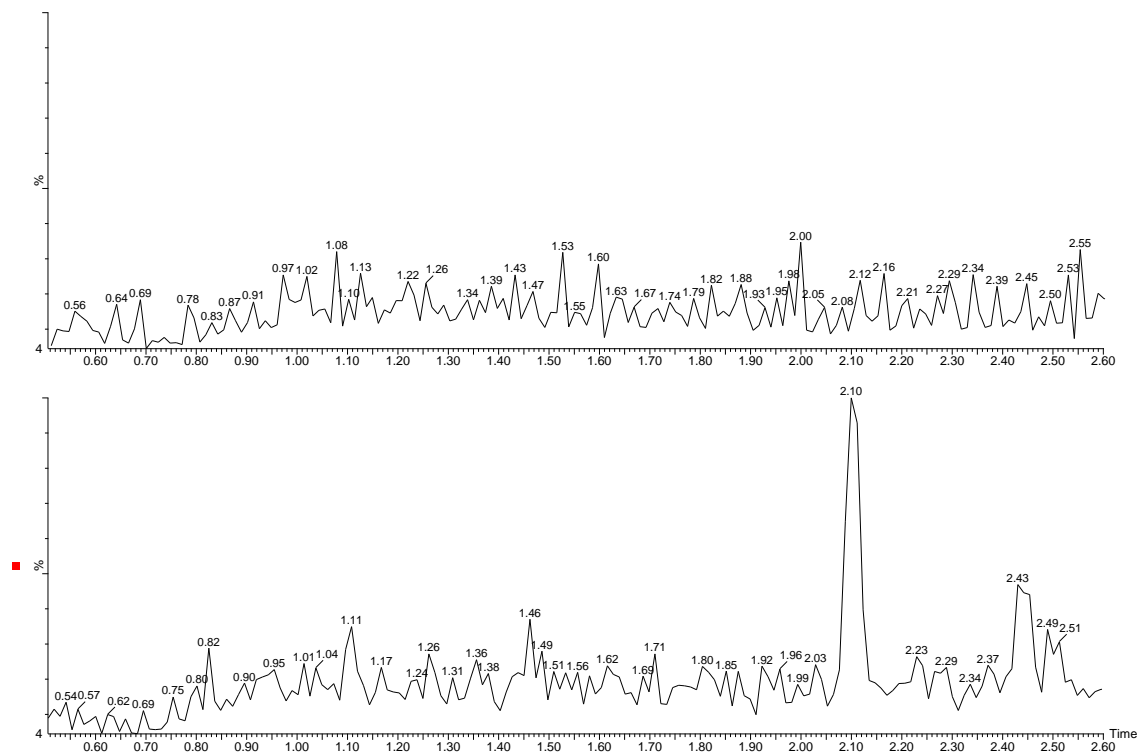

Base-peak chromatogram of the precursor ion scan for SV-B (CE=40 V).

| RT <sup>a</sup><br>(min) | Prod. <sup>b</sup> | <i>m/z</i> <sup>c</sup> | M <sub>r</sub> <sup>d</sup><br>(Da) | Identity | Comments                                                                                |
|--------------------------|--------------------|-------------------------|-------------------------------------|----------|-----------------------------------------------------------------------------------------|
| 2.10                     | 265                | 666.3                   | -                                   | Unknown  | Unlikely to be a microcystin because of retention time in conjunction with <i>m/z</i> . |

<sup>a</sup> RT = Retention time on a Waters Acquity BEH-C<sub>18</sub> UPLC column (2.1×50 mm; 1.7-μm). <sup>b</sup> Product ion trace in which the precursor ion was identified (*m/z* 135 for Adda-containing compounds or *m/z* 265 for ADMAAdda-containing compounds). <sup>c</sup> *m/z* = Mass-to-charge ratio of precursor ion. <sup>d</sup> M<sub>r</sub> = Molecular weight of the identified precursor ion.

## Environmental Sample SV-C

Svalbard Parent Scan - SV-C

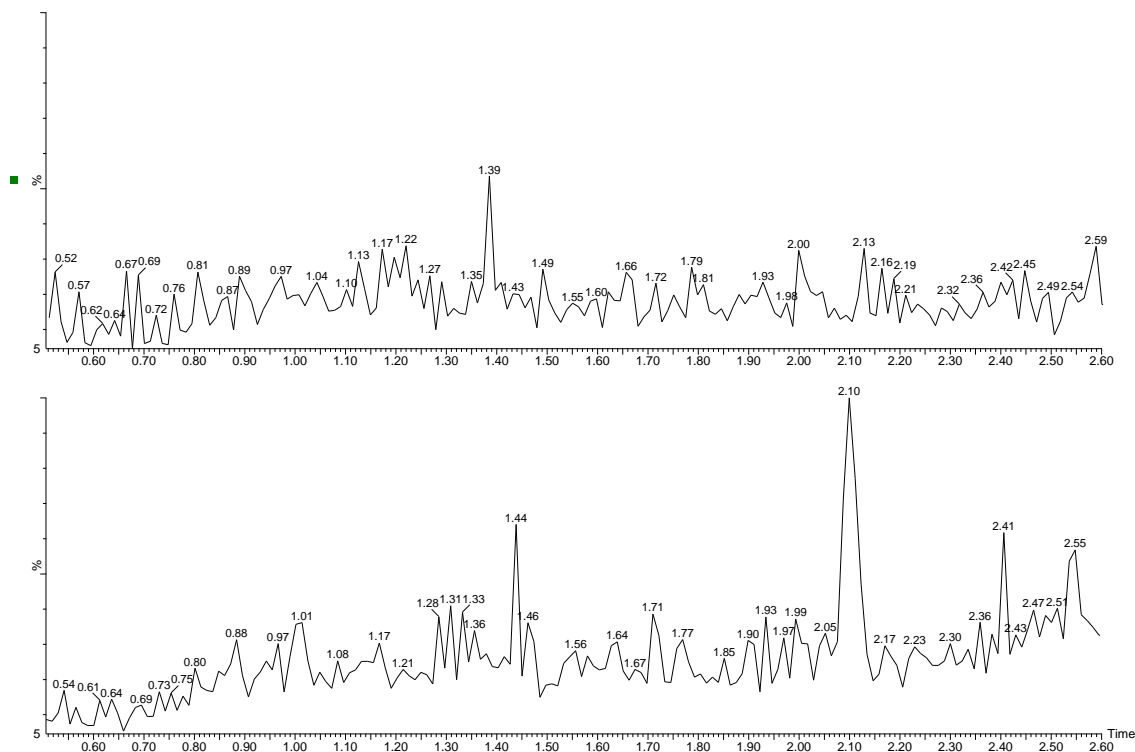

Base-peak chromatogram of the precursor ion scan for SV-C (CE=40 V).

| RT <sup>a</sup><br>(min) | Prod. <sup>b</sup> | m/z <sup>c</sup> | M <sub>r</sub> <sup>d</sup><br>(Da) | Identity | Comments                                                                        |
|--------------------------|--------------------|------------------|-------------------------------------|----------|---------------------------------------------------------------------------------|
| 2.10                     | 265                | 666.1            | -                                   | Unknown  | Unlikely to be a microcystin because of retention time in conjunction with m/z. |

<sup>a</sup> RT = Retention time on a Waters Acquity BEH-C<sub>18</sub> UPLC column (2.1×50 mm; 1.7-μm). <sup>b</sup> Product ion trace in which the precursor ion was identified (m/z 135 for Adda-containing compounds or m/z 265 for ADMAAdda-containing compounds). <sup>c</sup> m/z = Mass-to-charge ratio of precursor ion. <sup>d</sup> M<sub>r</sub> = Molecular weight of the identified precursor ion.

## Environmental Sample SV-D

Svalbard Parent Scan - SV-D

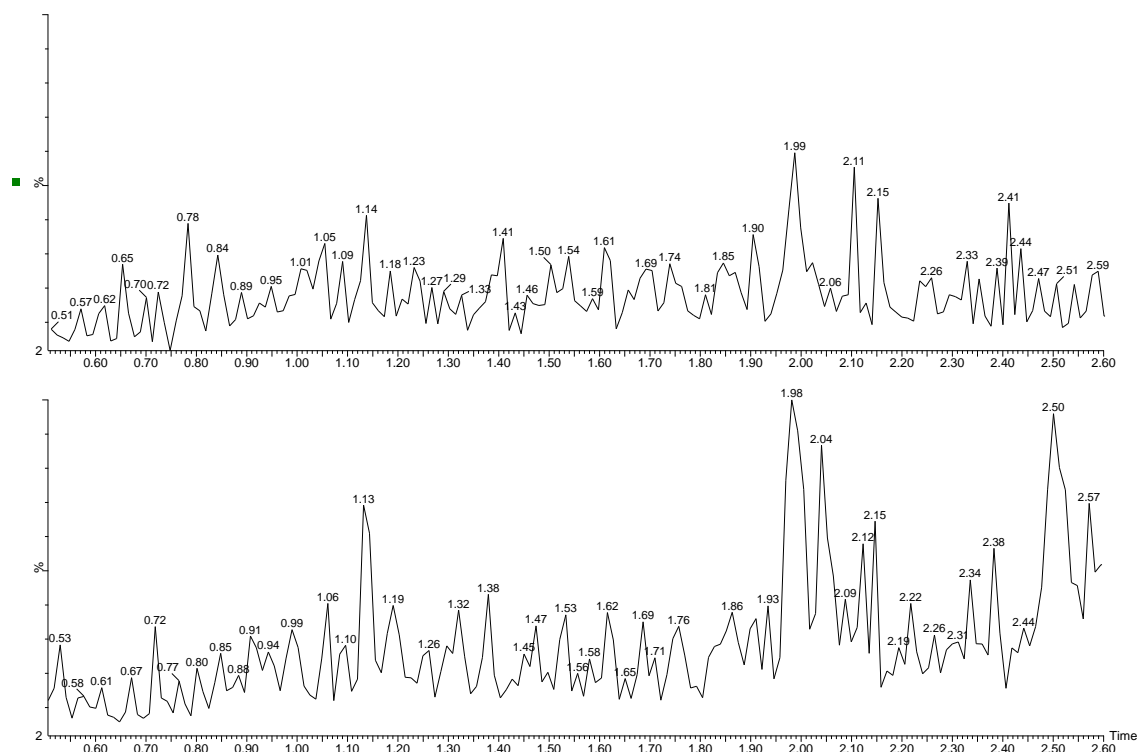

Base-peak chromatogram of the precursor ion scan for SV-D (CE=40 V).

| RT <sup>a</sup><br>(min) | Prod. <sup>b</sup> | m/z <sup>c</sup> | M <sub>r</sub> <sup>d</sup><br>(Da) | Identity                                                            | Comments                                                                        |
|--------------------------|--------------------|------------------|-------------------------------------|---------------------------------------------------------------------|---------------------------------------------------------------------------------|
| 1.13                     | 265                | 526.4            | 1051.6                              | [Asp <sup>3</sup> , ADMAdda <sup>5</sup> , Dhb <sup>7</sup> ] MC-RR | MS/MS used to confirm identity. Thiol derivatisation confirmed presence of Dhb. |
| 1.98                     | 265                | 575.2            | -                                   | Unknown                                                             | Unlikely to be a microcystin because of retention time in conjunction with m/z. |
| 1.99                     | 135                | 575.2            | -                                   | Unknown                                                             | Unlikely to be a microcystin because of retention time in conjunction with m/z. |
| 2.04                     | 265                | 575.2            | -                                   | Unknown                                                             | Unlikely to be a microcystin because of retention time in conjunction with m/z. |
| 2.11                     | 135                | 557.5            | -                                   | Unknown                                                             | Unlikely to be a microcystin because of retention time in conjunction with m/z. |
| 2.15                     | 135                | 557.7            | -                                   | Unknown                                                             | Unlikely to be a microcystin because of retention time in conjunction with m/z. |
| 2.50                     | 265                | 846.3            | -                                   | Unknown                                                             | Unlikely to be a microcystin because of retention time in conjunction with m/z. |

<sup>a</sup> RT = Retention time on a Waters Acquity BEH-C<sub>18</sub> UPLC column (2.1×50 mm; 1.7-μm). <sup>b</sup> Product ion trace in which the precursor ion was identified (m/z 135 for Adda-containing compounds or m/z 265 for ADMAdda-containing compounds). <sup>c</sup> m/z = Mass-to-charge ratio of precursor ion. <sup>d</sup> M<sub>r</sub> = Molecular weight of the identified precursor ion.

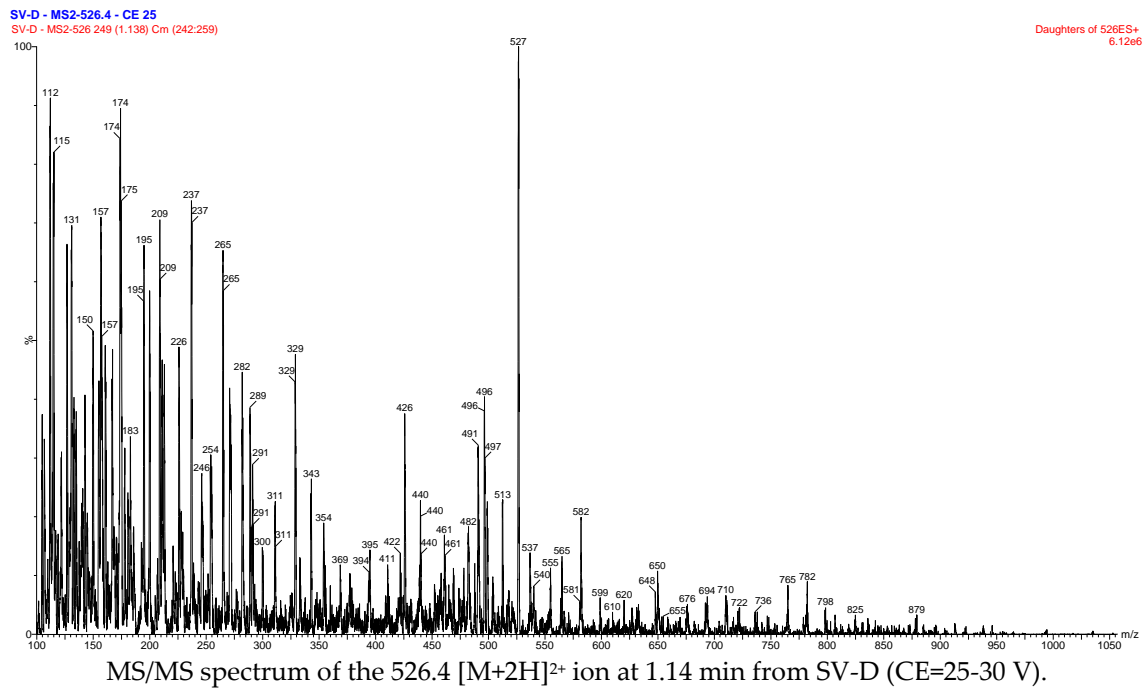

## Environmental Sample SV-E

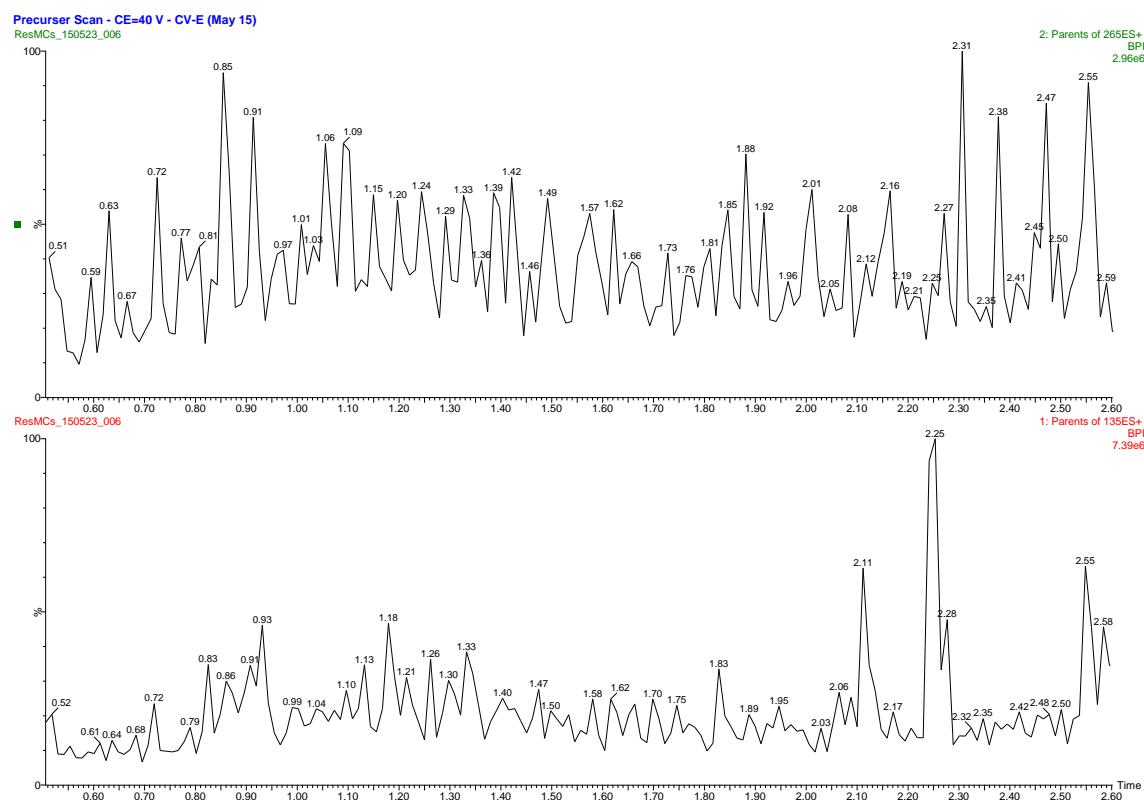

Base-peak chromatogram of the precursor ion scan for SV-E (CE=40 V).

| RT <sup>a</sup><br>(min) | Prod. <sup>b</sup> | m/z <sup>c</sup> | Mr <sup>d</sup><br>(Da) | Identity | Comments                                                                        |
|--------------------------|--------------------|------------------|-------------------------|----------|---------------------------------------------------------------------------------|
| 0.85                     | 265                | 594.1            | -                       | Unknown  | Unlikely to be a microcystin because of retention time in conjunction with m/z. |
| 0.91                     | 265                | 665.1            | -                       | Unknown  | Unlikely to be a microcystin because of retention time in conjunction with m/z. |
| 2.11                     | 135                | 666.2            | -                       | Unknown  | Unlikely to be a microcystin because of retention time in conjunction with m/z. |
| 2.25                     | 135                | 666.3            | -                       | Unknown  | Unlikely to be a microcystin because of retention time in conjunction with m/z. |
| 2.28                     | 135                | 559.0            | -                       | Unknown  | Unlikely to be a microcystin because of retention time in conjunction with m/z. |
| 2.31                     | 265                | 675.4            | -                       | Unknown  | Unlikely to be a microcystin because of retention time in conjunction with m/z. |
| 2.38                     | 265                | 581.8            | -                       | Unknown  | Unlikely to be a microcystin because of retention time in conjunction with m/z. |
| 2.47                     | 265                | 650.7            | -                       | Unknown  | Unlikely to be a microcystin because of retention time in conjunction with m/z. |
| 2.55                     | 135                | 504.0            | -                       | Unknown  | Unlikely to be a microcystin because of retention time in conjunction with m/z. |
| 2.55                     | 265                | 957.0            | -                       | Unknown  | Unlikely to be a microcystin because of retention time in conjunction with m/z. |

<sup>a</sup> RT = Retention time on a Waters Acquity BEH-C<sub>18</sub> UPLC column (2.1×50 mm; 1.7-μm). <sup>b</sup> Product ion trace in which the precursor ion was identified (m/z 135 for Adda-containing compounds or m/z 265 for ADMAdda-containing compounds). <sup>c</sup> m/z = Mass-to-charge ratio of precursor ion. <sup>d</sup> Mr = Molecular weight of the identified precursor ion.

## Environmental Sample SV-02

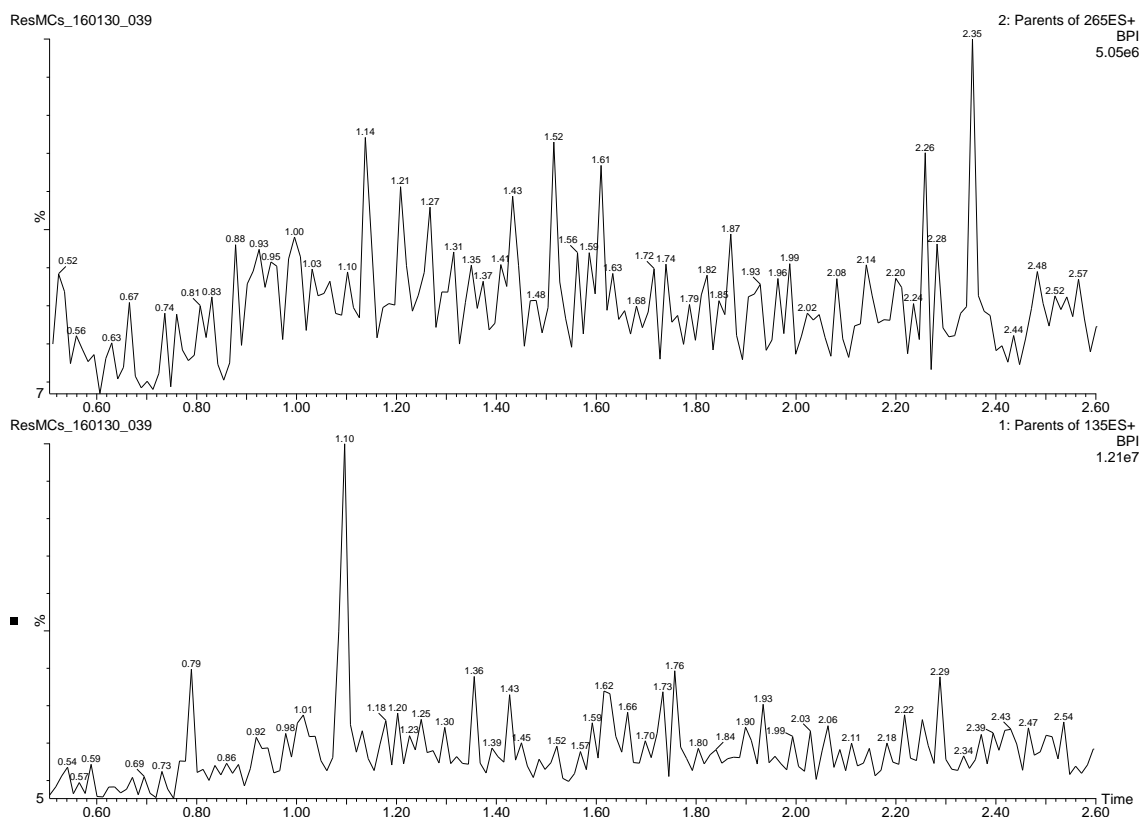

Base-peak chromatogram of the precursor ion scan for SV-02 (CE=40 V).

| RT <sup>a</sup><br>(min) | Prod. <sup>b</sup> | m/z <sup>c</sup> | M <sub>r</sub> <sup>d</sup><br>(Da) | Identity | Comments                                                                        |
|--------------------------|--------------------|------------------|-------------------------------------|----------|---------------------------------------------------------------------------------|
| 0.79                     | 135                | 636.0            | -                                   | Unknown  | Unlikely to be a microcystin because of retention time in conjunction with m/z. |
| 1.10                     | 135                | 837.5            | -                                   | Unknown  | Unlikely to be a microcystin because of retention time in conjunction with m/z. |
| 1.14                     | 265                | 615.7            | -                                   | Unknown  | Unlikely to be a microcystin because of retention time in conjunction with m/z. |
| 2.35                     | 265                | 747.2            | -                                   | Unknown  | Unlikely to be a microcystin because of retention time in conjunction with m/z. |

<sup>a</sup> RT = Retention time on a Waters Acquity BEH-C<sub>18</sub> UPLC column (2.1×50 mm; 1.7-μm). <sup>b</sup> Product ion trace in which the precursor ion was identified (m/z 135 for Adda-containing compounds or m/z 265 for ADMAAdda-containing compounds). <sup>c</sup> m/z = Mass-to-charge ratio of precursor ion. <sup>d</sup> M<sub>r</sub> = Molecular weight of the identified precursor ion.



## Environmental Sample SV-08

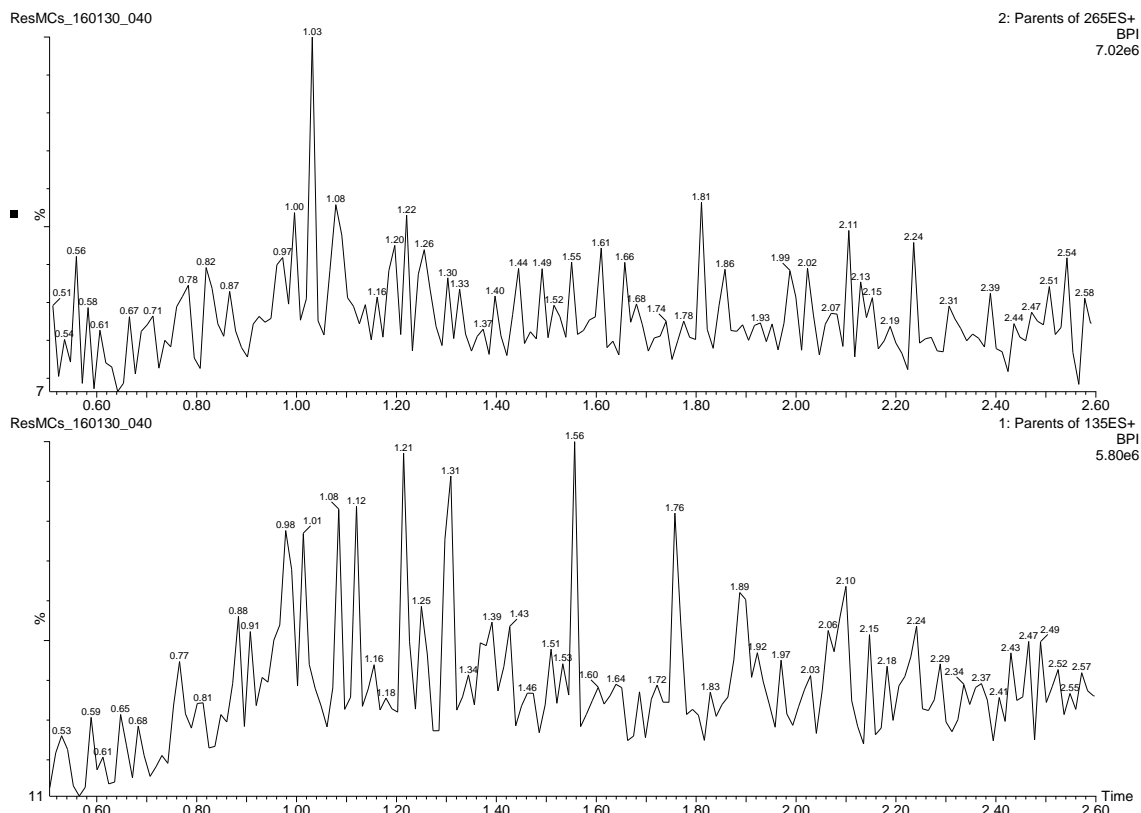

Base-peak chromatogram of the precursor ion scan for SV-08 (CE=40 V).

| RT <sup>a</sup><br>(min) | Prod. <sup>b</sup> | m/z <sup>c</sup> | M <sub>r</sub> <sup>d</sup><br>(Da) | Identity | Comments                                                                        |
|--------------------------|--------------------|------------------|-------------------------------------|----------|---------------------------------------------------------------------------------|
| 1.03                     | 265                | 453.6            | -                                   | Unknown  | Unlikely to be a microcystin because of retention time in conjunction with m/z. |

<sup>a</sup> RT = Retention time on a Waters Acquity BEH-C<sub>18</sub> UPLC column (2.1×50 mm; 1.7-μm). <sup>b</sup> Product ion trace in which the precursor ion was identified (m/z 135 for Adda-containing compounds or m/z 265 for ADMAAdda-containing compounds). <sup>c</sup> m/z = Mass-to-charge ratio of precursor ion. <sup>d</sup> M<sub>r</sub> = Molecular weight of the identified precursor ion.

## Environmental Sample SV-13

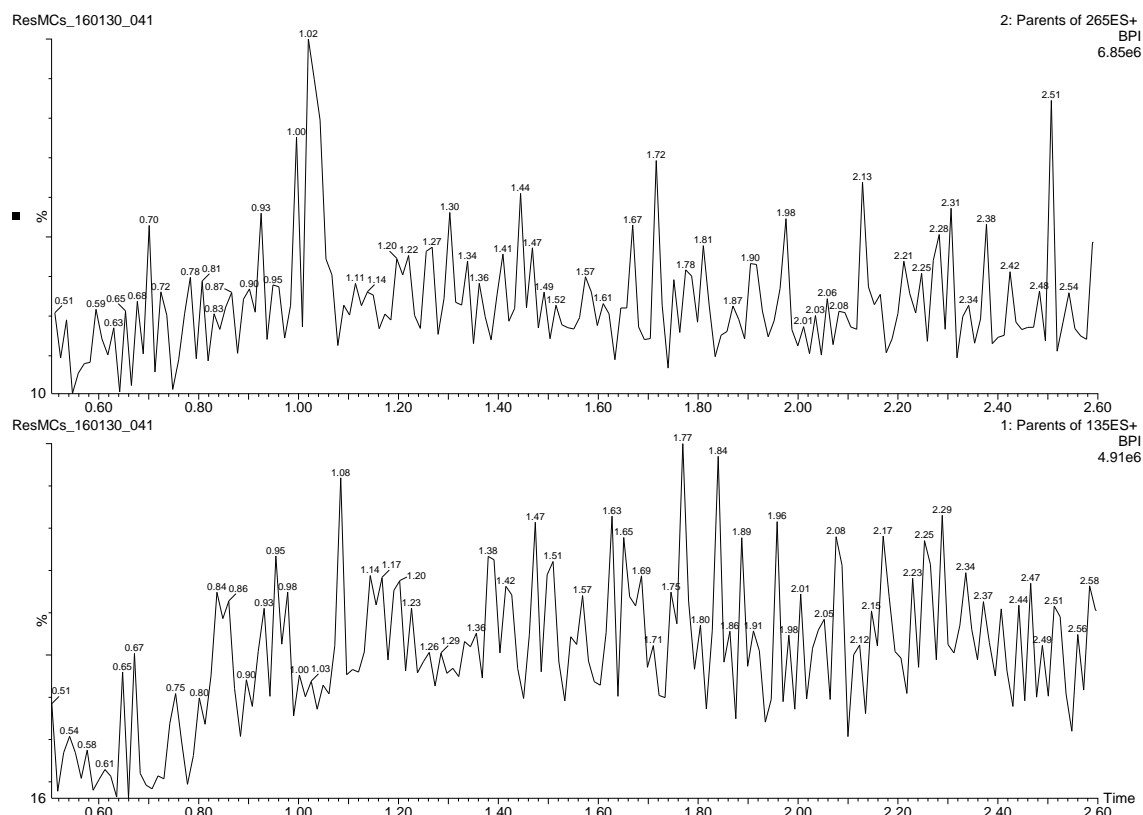

Base-peak chromatogram of the precursor ion scan for SV-13 (CE=40 V).

| RT <sup>a</sup><br>(min) | Prod. <sup>b</sup> | m/z <sup>c</sup> | M <sub>r</sub> <sup>d</sup><br>(Da) | Identity | Comments                                                                        |
|--------------------------|--------------------|------------------|-------------------------------------|----------|---------------------------------------------------------------------------------|
| 1.02                     | 265                | 452.7            | -                                   | Unknown  | Unlikely to be a microcystin because of retention time in conjunction with m/z. |
| 1.08                     | 135                | 701.5            | -                                   | Unknown  | Unlikely to be a microcystin because of retention time in conjunction with m/z. |
| 1.77                     | 135                | 630.7            | -                                   | Unknown  | Unlikely to be a microcystin because of retention time in conjunction with m/z. |

<sup>a</sup> RT = Retention time on a Waters Acquity BEH-C<sub>18</sub> UPLC column (2.1×50 mm; 1.7-μm). <sup>b</sup> Product ion trace in which the precursor ion was identified (m/z 135 for Adda-containing compounds or m/z 265 for ADMAAdda-containing compounds). <sup>c</sup> m/z = Mass-to-charge ratio of precursor ion. <sup>d</sup> M<sub>r</sub> = Molecular weight of the identified precursor ion.

## Environmental Sample SV-16

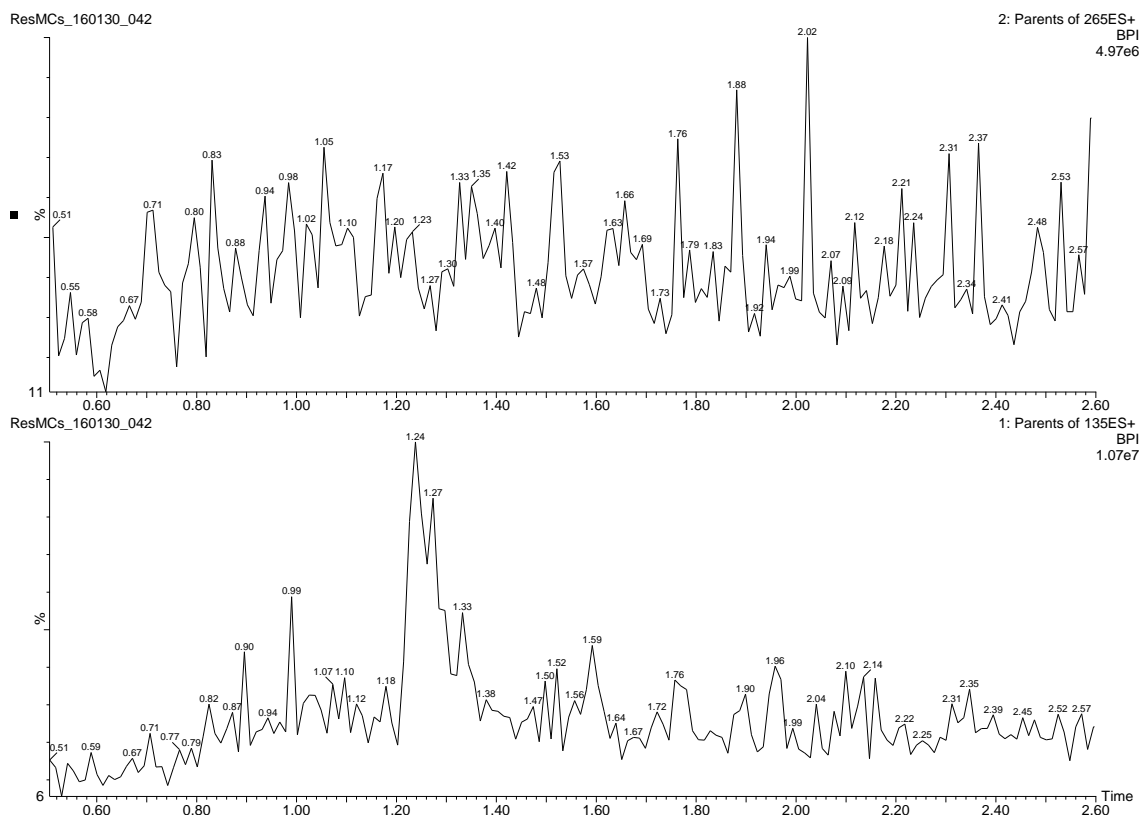

Base-peak chromatogram of the precursor ion scan for SV-16 (CE=40 V).

| RT <sup>a</sup><br>(min) | Prod. <sup>b</sup> | m/z <sup>c</sup> | M <sub>r</sub> <sup>d</sup><br>(Da) | Identity | Comments                                                                        |
|--------------------------|--------------------|------------------|-------------------------------------|----------|---------------------------------------------------------------------------------|
| 0.99                     | 135                | 752.7            | -                                   | Unknown  | Unlikely to be a microcystin because of retention time in conjunction with m/z. |
| 1.24                     | 135                | 604.8            | -                                   | Unknown  | Unlikely to be a microcystin because of retention time in conjunction with m/z. |
| 1.53                     | 265                | 863.9            | -                                   | Unknown  | Unlikely to be a microcystin because of retention time in conjunction with m/z. |
| 1.76                     | 265                | 827.2            | -                                   | Unknown  | Unlikely to be a microcystin because of retention time in conjunction with m/z. |
| 1.88                     | 265                | 818.9            | -                                   | Unknown  | Unlikely to be a microcystin because of retention time in conjunction with m/z. |
| 2.02                     | 265                | 817.4            | -                                   | Unknown  | Unlikely to be a microcystin because of retention time in conjunction with m/z. |

<sup>a</sup> RT = Retention time on a Waters Acquity BEH-C<sub>18</sub> UPLC column (2.1×50 mm; 1.7-μm). <sup>b</sup> Product ion trace in which the precursor ion was identified (m/z 135 for Adda-containing compounds or m/z 265 for ADMAdda-containing compounds). <sup>c</sup> m/z = Mass-to-charge ratio of precursor ion. <sup>d</sup> M<sub>r</sub> = Molecular weight of the identified precursor ion.

## Environmental Sample SV-17

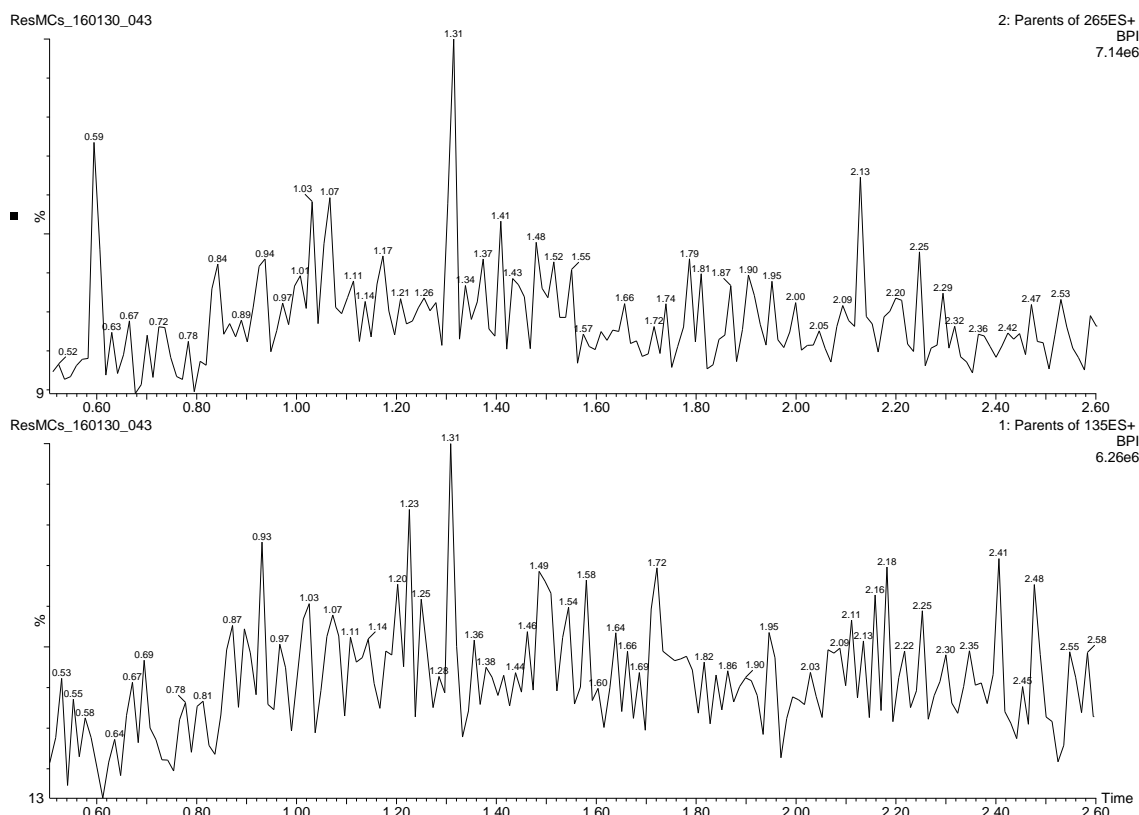

Base-peak chromatogram of the precursor ion scan for SV-17 (CE=40 V).

| RT <sup>a</sup><br>(min) | Prod. <sup>b</sup> | m/z <sup>c</sup> | M <sub>r</sub> <sup>d</sup><br>(Da) | Identity | Comments                                                                        |
|--------------------------|--------------------|------------------|-------------------------------------|----------|---------------------------------------------------------------------------------|
| 1.31                     | 265                | 757.5            | -                                   | Unknown  | Unlikely to be a microcystin because of retention time in conjunction with m/z. |
| 1.31                     | 135                | 1070.9           | -                                   | Unknown  | Insufficient signal in MS/MS spectrum.                                          |
| 2.13                     | 265                | 933.7            | -                                   | Unknown  | Insufficient signal in MS/MS spectrum.                                          |

<sup>a</sup> RT = Retention time on a Waters Acquity BEH-C<sub>18</sub> UPLC column (2.1×50 mm; 1.7-μm). <sup>b</sup> Product ion trace in which the precursor ion was identified (m/z 135 for Adda-containing compounds or m/z 265 for ADMAAdda-containing compounds). <sup>c</sup> m/z = Mass-to-charge ratio of precursor ion. <sup>d</sup> M<sub>r</sub> = Molecular weight of the identified precursor ion.

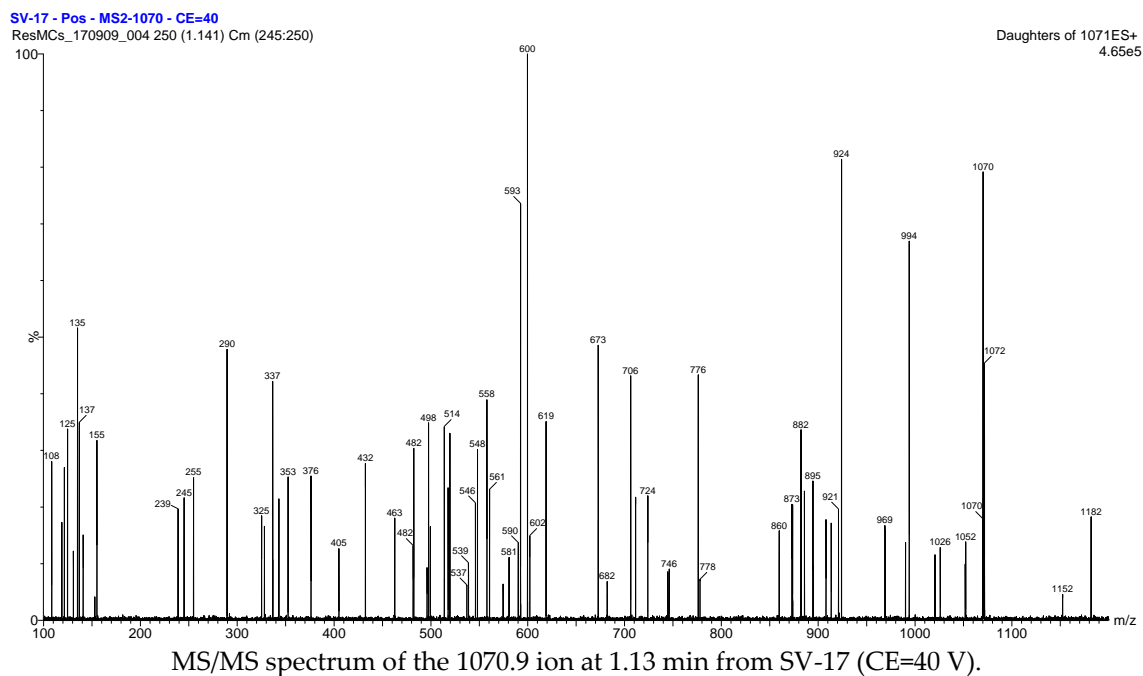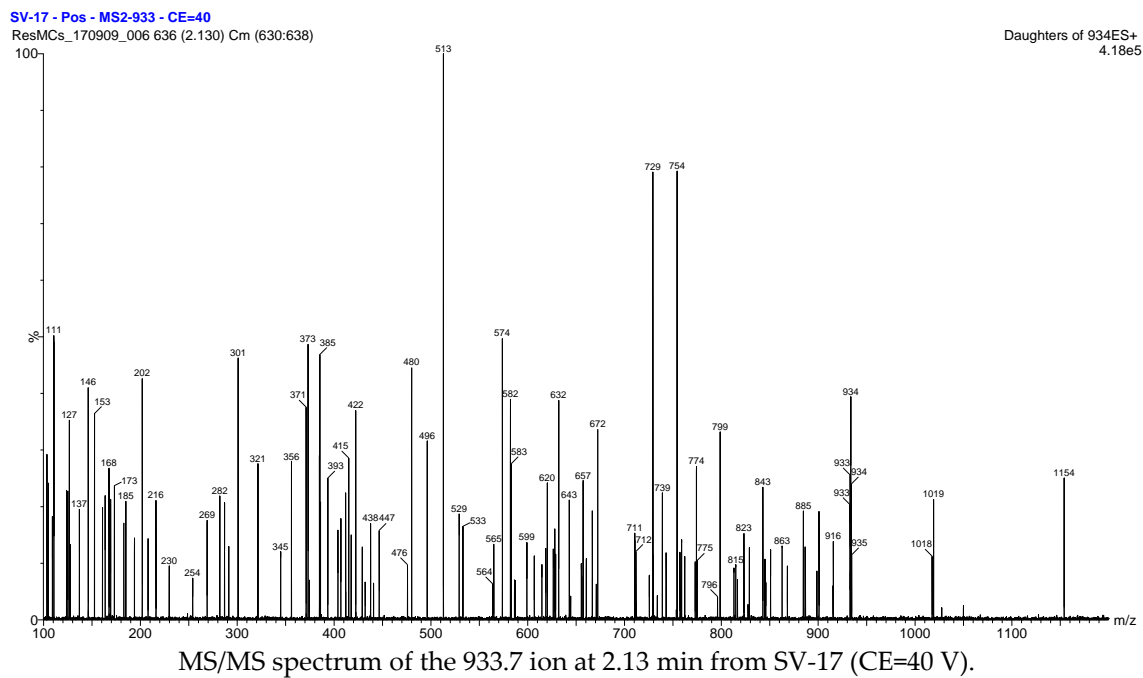

## Environmental Sample SV-49

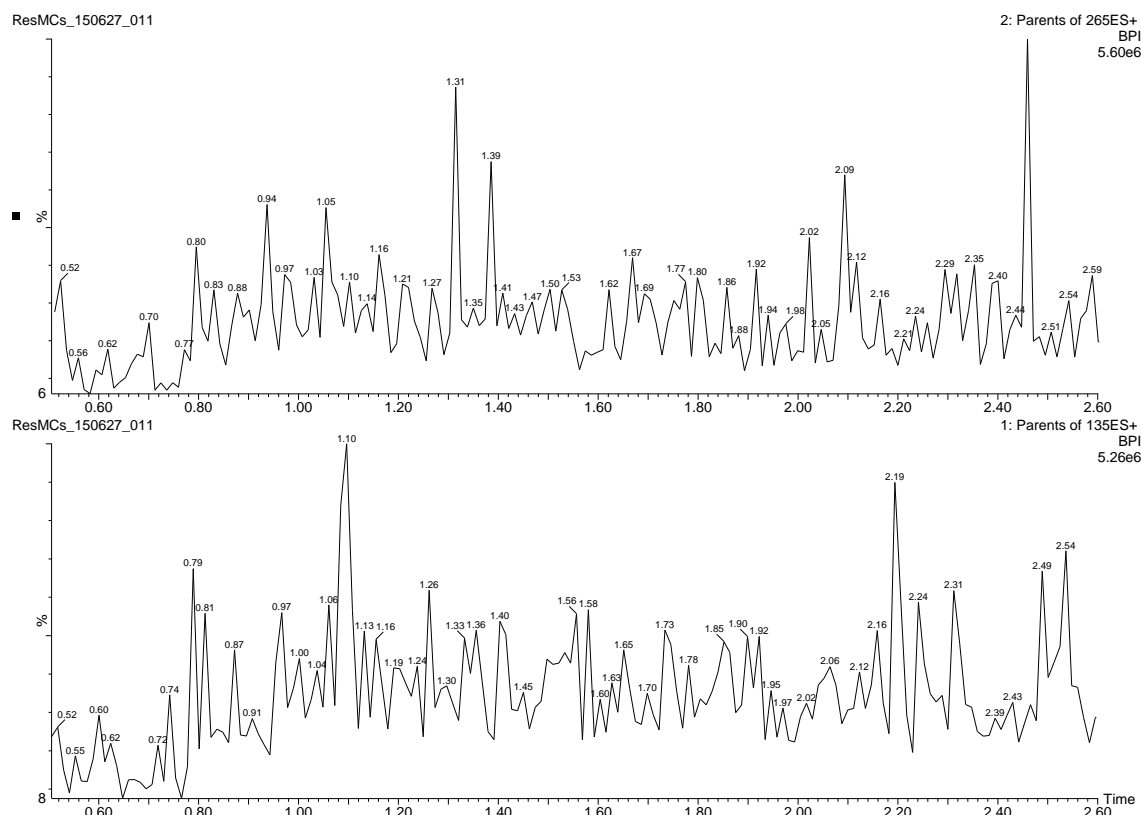

Base-peak chromatogram of the precursor ion scan for SV-49 (CE=40 V).

| RT <sup>a</sup><br>(min) | Prod. <sup>b</sup> | m/z <sup>c</sup> | M <sub>r</sub> <sup>d</sup><br>(Da) | Identity                                                            | Comments                                                                        |
|--------------------------|--------------------|------------------|-------------------------------------|---------------------------------------------------------------------|---------------------------------------------------------------------------------|
| 1.10                     | 135                | 837.9            | -                                   | Unknown                                                             | Unlikely to be a microcystin because of retention time in conjunction with m/z. |
| 1.31                     | 265                | 577.7            | -                                   | Unknown                                                             | Unlikely to be a microcystin because of retention time in conjunction with m/z. |
| 1.39                     | 265                | 1009.6           | 1008.5                              | [Asp <sup>3</sup> , ADMAdda <sup>5</sup> , Dhb <sup>7</sup> ] MC-LR | MS/MS used to confirm identity. Thiol derivatisation confirmed presence of Dhb. |
| 2.09                     | 265                | 709.8            | -                                   | Unknown                                                             | Unlikely to be a microcystin because of retention time in conjunction with m/z. |
| 2.19                     | 135                | 1012.9           | -                                   | Unknown                                                             | Insufficient signal in MS/MS spectrum.                                          |
| 2.46                     | 265                | 597.6            | -                                   | Unknown                                                             | Unlikely to be a microcystin because of retention time in conjunction with m/z. |

<sup>a</sup> RT = Retention time on a Waters Acquity BEH-C<sub>18</sub> UPLC column (2.1×50 mm; 1.7-μm). <sup>b</sup> Product ion trace in which the precursor ion was identified (m/z 135 for Adda-containing compounds or m/z 265 for ADMAdda-containing compounds). <sup>c</sup> m/z = Mass-to-charge ratio of precursor ion. <sup>d</sup> M<sub>r</sub> = Molecular weight of the identified precursor ion.

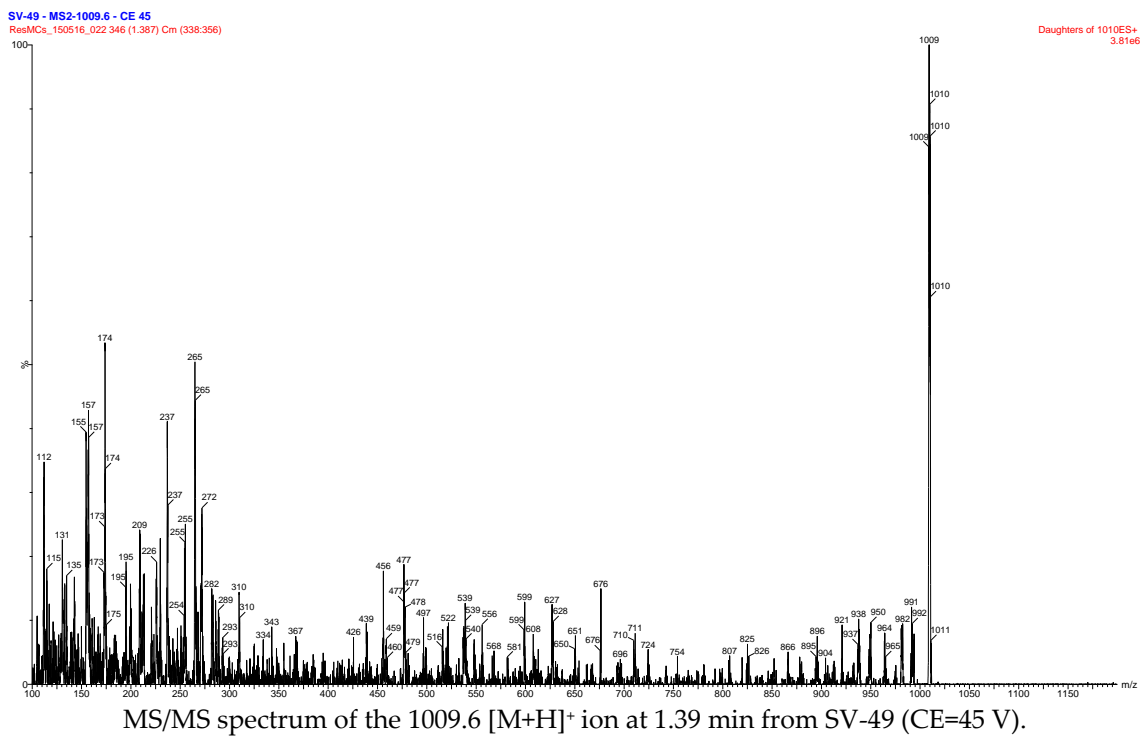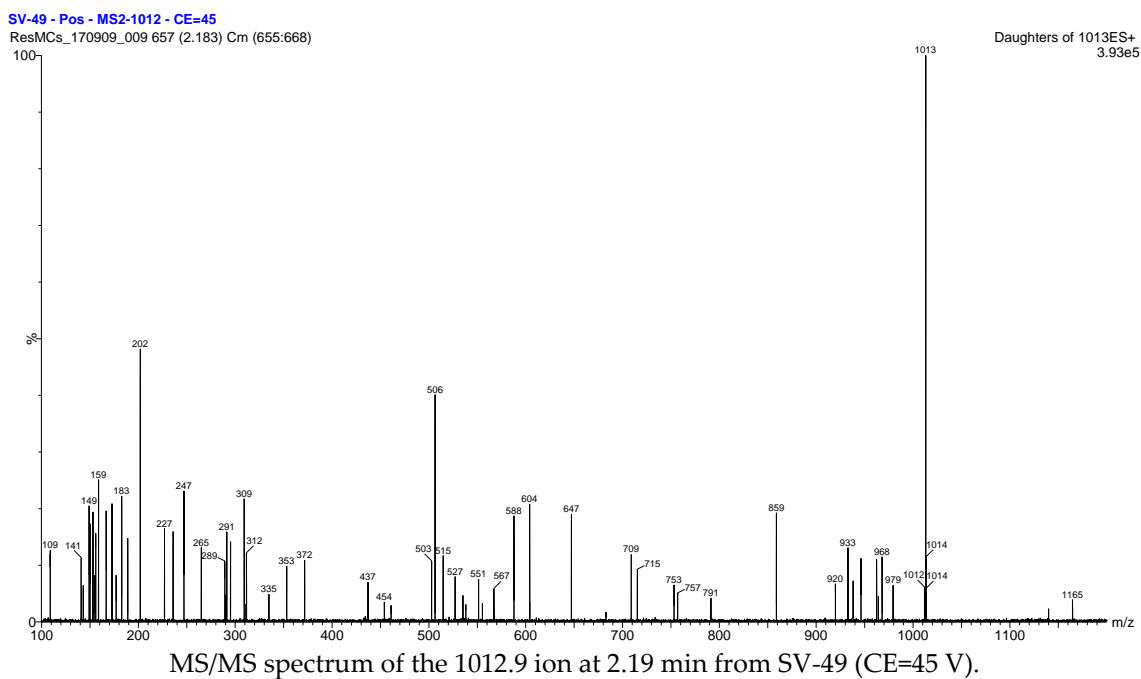

## Environmental Sample SV-54

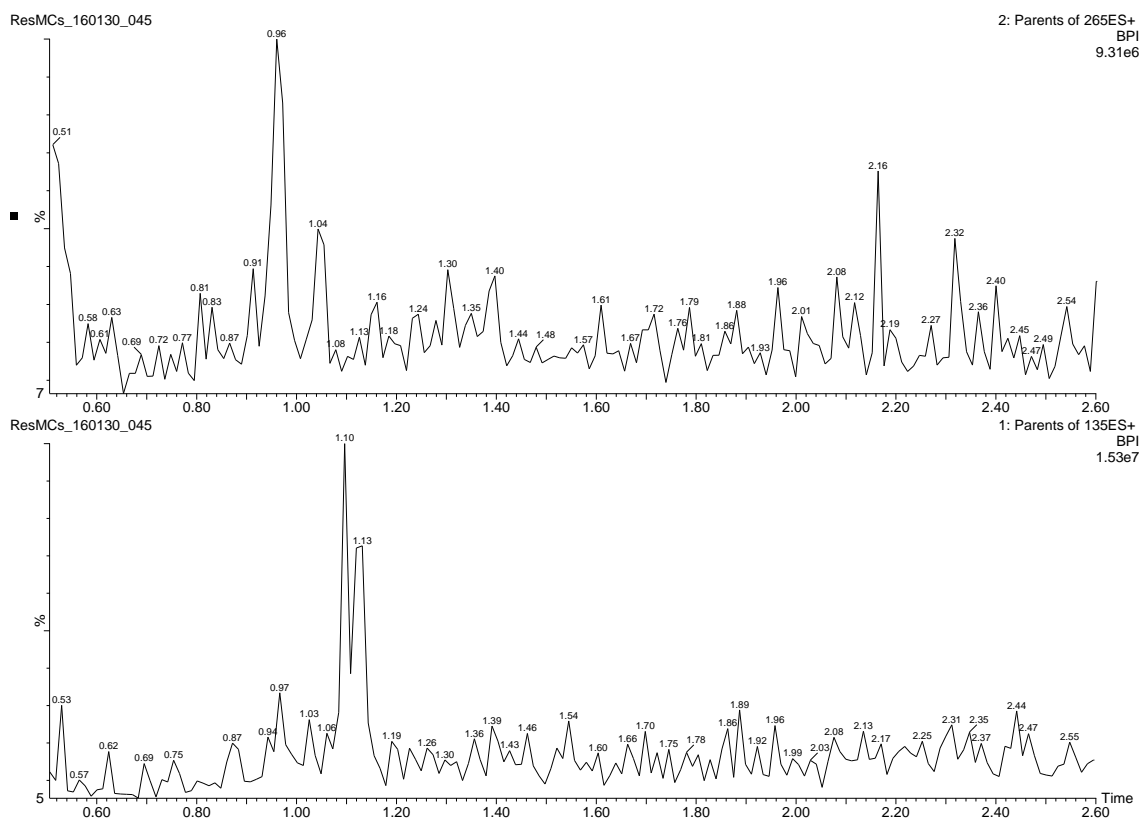

Base-peak chromatogram of the precursor ion scan for SV-54 (CE=40 V).

| RT <sup>a</sup><br>(min) | Prod. <sup>b</sup> | m/z <sup>c</sup> | M <sub>r</sub> <sup>d</sup><br>(Da) | Identity | Comments                                                                        |
|--------------------------|--------------------|------------------|-------------------------------------|----------|---------------------------------------------------------------------------------|
| 0.96                     | 265                | 480.8            | -                                   | Unknown  | Unlikely to be a microcystin because of retention time in conjunction with m/z. |
| 1.04                     | 265                | 487.8            | -                                   | Unknown  | Unlikely to be a microcystin because of retention time in conjunction with m/z. |
| 1.10                     | 135                | 837.2            | -                                   | Unknown  | Unlikely to be a microcystin because of retention time in conjunction with m/z. |
| 1.13                     | 135                | 882.2            | -                                   | Unknown  | Unlikely to be a microcystin because of retention time in conjunction with m/z. |
| 2.16                     | 265                | 667.7            | -                                   | Unknown  | Unlikely to be a microcystin because of retention time in conjunction with m/z. |
| 2.32                     | 265                | 586.4            | -                                   | Unknown  | Unlikely to be a microcystin because of retention time in conjunction with m/z. |

<sup>a</sup> RT = Retention time on a Waters Acquity BEH-C<sub>18</sub> UPLC column (2.1×50 mm; 1.7-μm). <sup>b</sup> Product ion trace in which the precursor ion was identified (m/z 135 for Adda-containing compounds or m/z 265 for ADMAAdda-containing compounds). <sup>c</sup> m/z = Mass-to-charge ratio of precursor ion. <sup>d</sup> M<sub>r</sub> = Molecular weight of the identified precursor ion.



## Environmental Sample SV-56

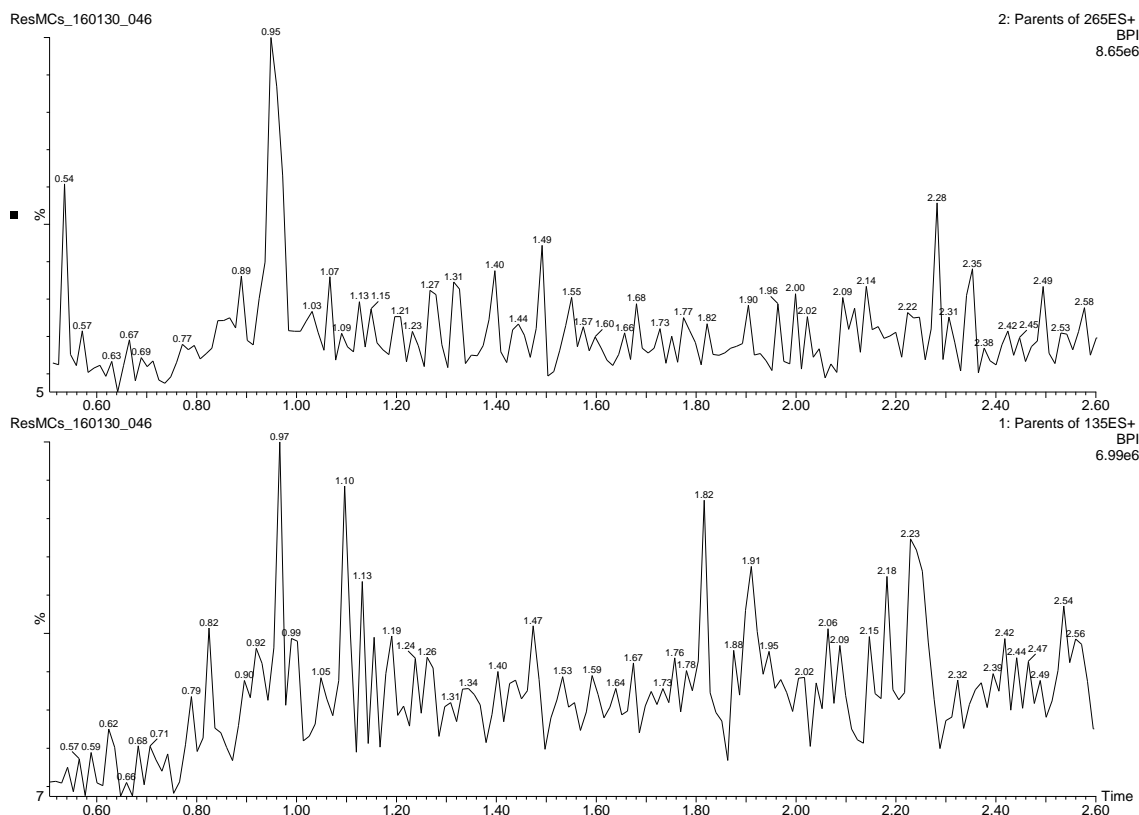

Base-peak chromatogram of the precursor ion scan for SV-56 (CE=40 V).

| RT <sup>a</sup><br>(min) | Prod. <sup>b</sup> | m/z <sup>c</sup> | M <sub>r</sub> <sup>d</sup><br>(Da) | Identity | Comments                                                                        |
|--------------------------|--------------------|------------------|-------------------------------------|----------|---------------------------------------------------------------------------------|
| 0.95                     | 265                | 628.9            | -                                   | Unknown  | Unlikely to be a microcystin because of retention time in conjunction with m/z. |
| 0.97                     | 135                | 487.9            | -                                   | Unknown  | Unlikely to be a microcystin because of retention time in conjunction with m/z. |
| 1.10                     | 135                | 837.2            | -                                   | Unknown  | Unlikely to be a microcystin because of retention time in conjunction with m/z. |
| 1.82                     | 135                | 744.0            | -                                   | Unknown  | Unlikely to be a microcystin because of retention time in conjunction with m/z. |
| 2.23                     | 135                | 724.2            | -                                   | Unknown  | Unlikely to be a microcystin because of retention time in conjunction with m/z. |
| 2.28                     | 265                | 543.0            | -                                   | Unknown  | Unlikely to be a microcystin because of retention time in conjunction with m/z. |

<sup>a</sup> RT = Retention time on a Waters Acquity BEH-C<sub>18</sub> UPLC column (2.1×50 mm; 1.7-μm). <sup>b</sup> Product ion trace in which the precursor ion was identified (m/z 135 for Adda-containing compounds or m/z 265 for ADMAAdda-containing compounds). <sup>c</sup> m/z = Mass-to-charge ratio of precursor ion. <sup>d</sup> M<sub>r</sub> = Molecular weight of the identified precursor ion.

## Environmental Sample SV-74

Precursor Scan - CE=40 V - SV-74 (Sept 14)

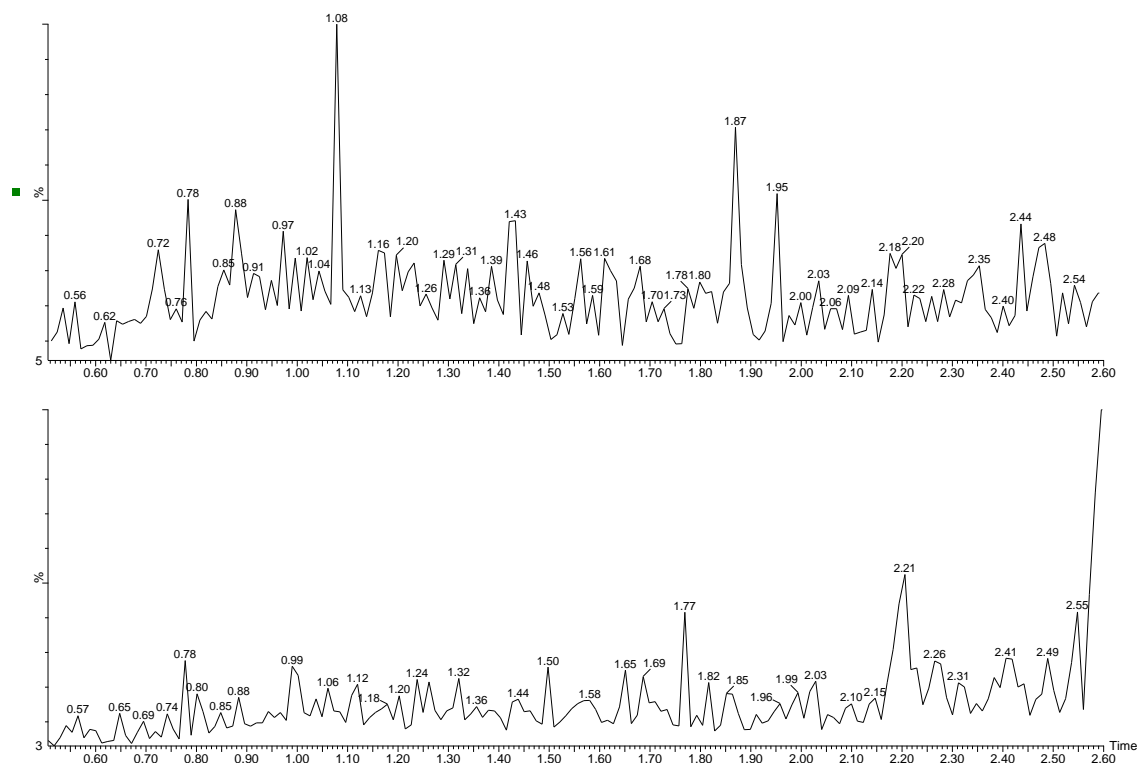

Base-peak chromatogram of the precursor ion scan for SV-74 (CE=40 V).

| RT <sup>a</sup><br>(min) | Prod. <sup>b</sup> | m/z <sup>c</sup> | Mr <sup>d</sup><br>(Da) | Identity | Comments                                                                         |
|--------------------------|--------------------|------------------|-------------------------|----------|----------------------------------------------------------------------------------|
| 0.82                     | 265                | 598.8            | -                       | Unknown  | Unlikely to be a microcystin because of retention time in conjunction with m/z.  |
| 0.99                     | 135                | 474.0            | -                       | Unknown  | Unlikely to be a microcystin because of retention time in conjunction with m/z.  |
| 1.27                     | 135                | 596.4            | -                       | Unknown  | MS/MS demonstrated this was not a MC.                                            |
| 1.92                     | 135                | 910.6            | 909.5                   | MC-LA    | MS/MS used to confirm identity. Thiol derivatisation confirmed presence of Mdha. |
| 2.20                     | 135                | 968.3            | -                       | Unknown  | MS/MS demonstrated this was not a MC.                                            |
| 2.42                     | 135                | 948.2            | -                       | Unknown  | Unlikely to be a microcystin because of retention time in conjunction with m/z.  |

<sup>a</sup> RT = Retention time on a Waters Acquity BEH-C<sub>18</sub> UPLC column (2.1×50 mm; 1.7-μm). <sup>b</sup> Product ion trace in which the precursor ion was identified (m/z 135 for Adda-containing compounds or m/z 265 for ADMAdda-containing compounds). <sup>c</sup> m/z = Mass-to-charge ratio of precursor ion. <sup>d</sup> Mr = Molecular weight of the identified precursor ion.

SV-74 - MS2-596.4 - CE 25  
SV-74 - MS2-596 310 (1.295) Cm (291:327)

Daughters of 597ES+  
3.73e6

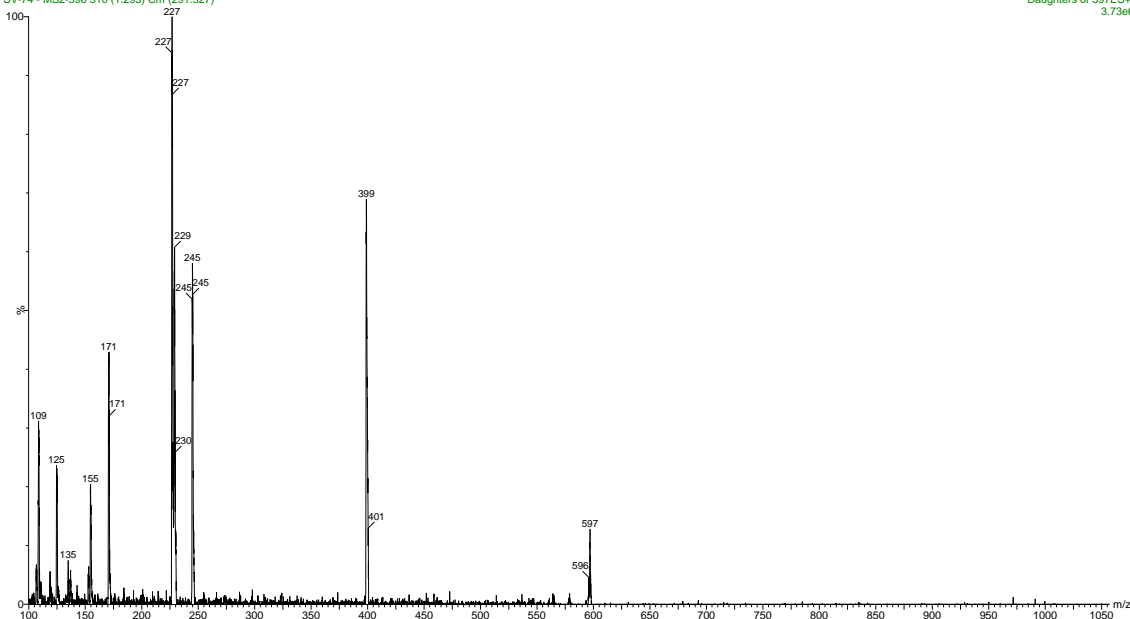

MS/MS spectrum of the 596.4 ion at 1.29 min from SV-74 (Sept 14; CE=25-30 V).

SV-74 - MS2-910.6 - CE 45  
SV-74 - MS2-910 575 (1.974) Cm (568:582)

Daughters of 911ES+  
1.94e6

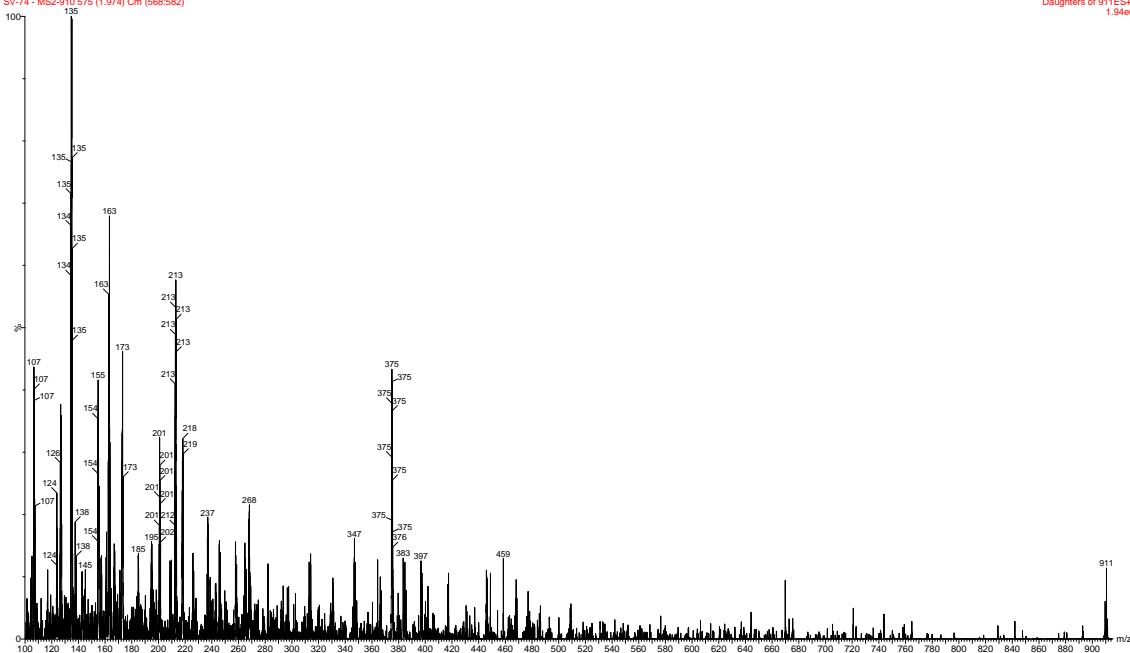

MS/MS spectrum of the 910.6 [M+H]<sup>+</sup> ion at 1.97 min from SV-74 (CE=35-45 V).

## Environmental Sample SV-75

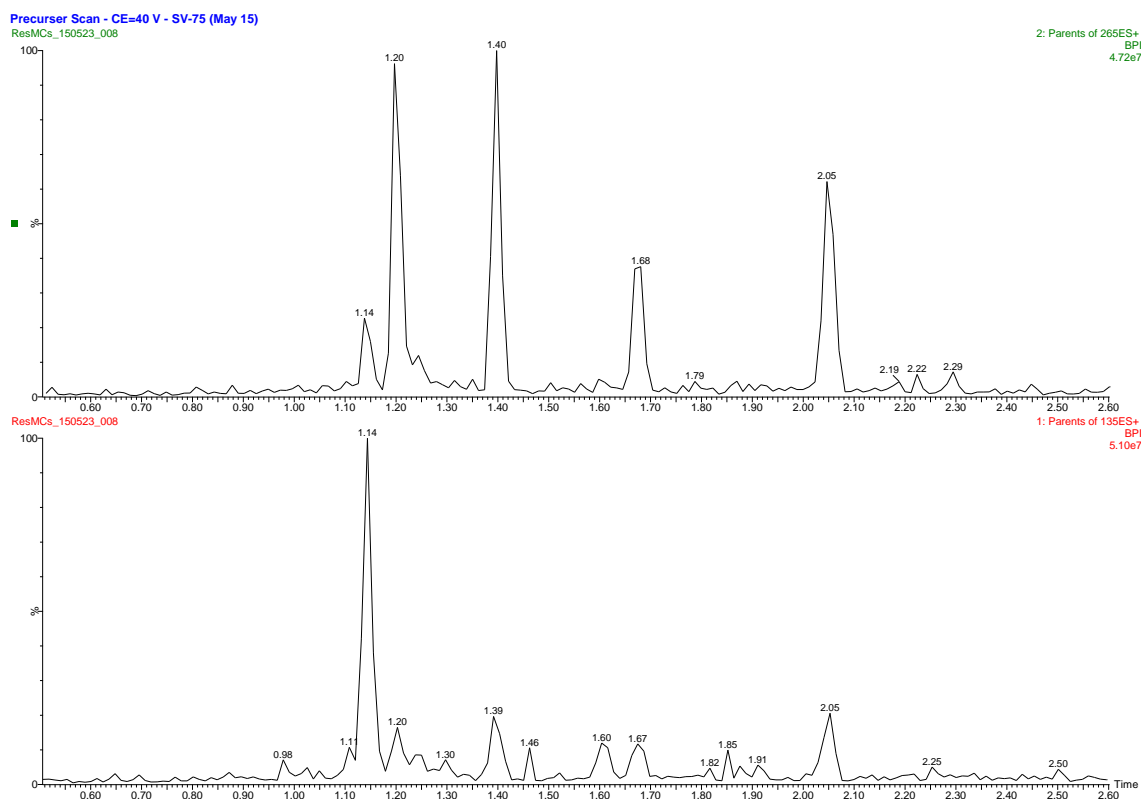

Base-peak chromatogram of the precursor ion scan for SV-75 (CE=40 V).

| RT <sup>a</sup><br>(min) | Prod. <sup>b</sup> | <i>m/z</i> <sup>c</sup> | <i>M<sub>r</sub></i> <sup>d</sup><br>(Da) | Identity                                                            | Comments                                                                        |
|--------------------------|--------------------|-------------------------|-------------------------------------------|---------------------------------------------------------------------|---------------------------------------------------------------------------------|
| 1.14                     | 265                | 526.7                   | 1051.6                                    | [Asp <sup>3</sup> , ADMAdda <sup>5</sup> , Dhb <sup>7</sup> ] MC-RR | MS/MS used to confirm identity. Thiol derivatisation confirmed presence of Dhb. |
| 1.20                     | 265                | 978.5                   | -                                         | Unknown                                                             | MS/MS indicated it is not a microcystin.                                        |
| 1.40                     | 265                | 1009.6                  | 1008.5                                    | [Asp <sup>3</sup> , ADMAdda <sup>5</sup> , Dhb <sup>7</sup> ] MC-LR | MS/MS used to confirm identity. Thiol derivatisation confirmed presence of Dhb. |
| 1.60                     | 135                | 1083.9                  | -                                         | Unknown                                                             | MS/MS indicated it is not a microcystin.                                        |
| 1.67                     | 135                | 1084.4                  | -                                         | Unknown                                                             | MS/MS indicated it is not a microcystin.                                        |
| 1.68                     | 265                | 1084.4                  | -                                         | Unknown                                                             | MS/MS indicated it is not a microcystin.                                        |
| 2.05                     | 265                | 1098.7                  | -                                         | Unknown                                                             | MS/MS indicated it is not a microcystin.                                        |
| 2.05                     | 135                | 1098.7                  | -                                         | Unknown                                                             | MS/MS indicated it is not a microcystin.                                        |

<sup>a</sup> RT = Retention time on a Waters Acquity BEH-C<sub>18</sub> UPLC column (2.1×50 mm; 1.7-μm). <sup>b</sup> Product ion trace in which the precursor ion was identified (*m/z* 135 for Adda-containing compounds or *m/z* 265 for ADMAdda-containing compounds). <sup>c</sup> *m/z* = Mass-to-charge ratio of precursor ion. <sup>d</sup> *M<sub>r</sub>* = Molecular weight of the identified precursor ion.

SV-75 (May 15) - MS2-526.6 - CE 25  
SV-75 - MS2-526.6 250 (1.141) Cm (245:257)

Daughters of 527ES+  
8.68e7

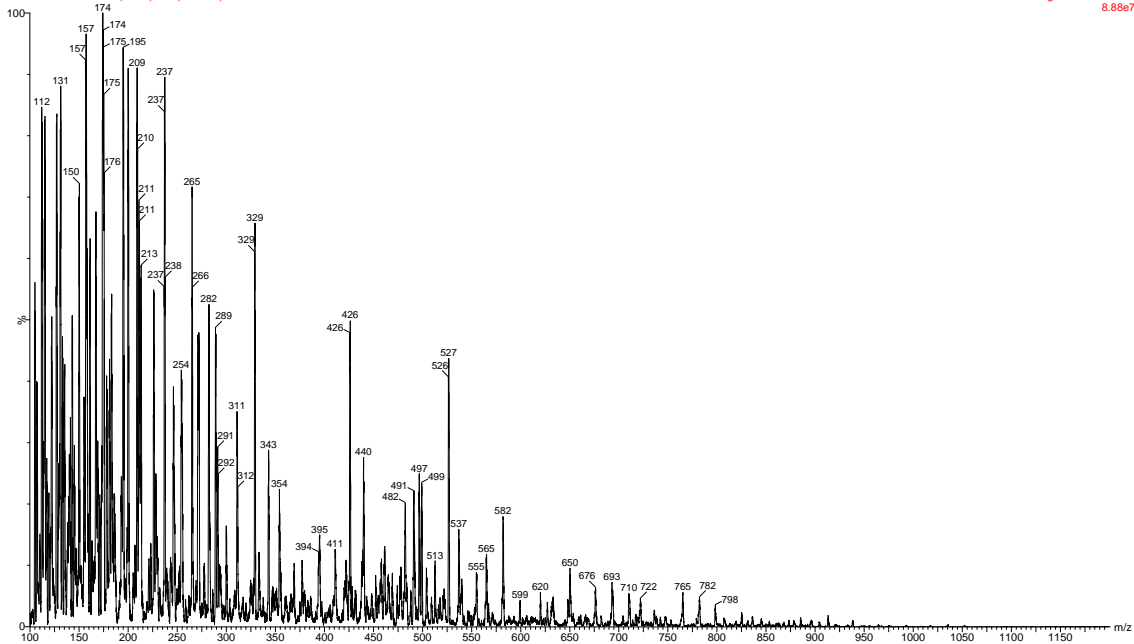

MS/MS spectrum of the 526.7  $[M+2H]^{2+}$  ion at 1.14 min from SV-75 (CE=25-30 V).

SV-75 (May 15) - MS2-978.5 - CE 45  
ResMCs\_150530\_022 271 (1.194) Cm (263:293)

Daughters of 979ES+  
9.10e7

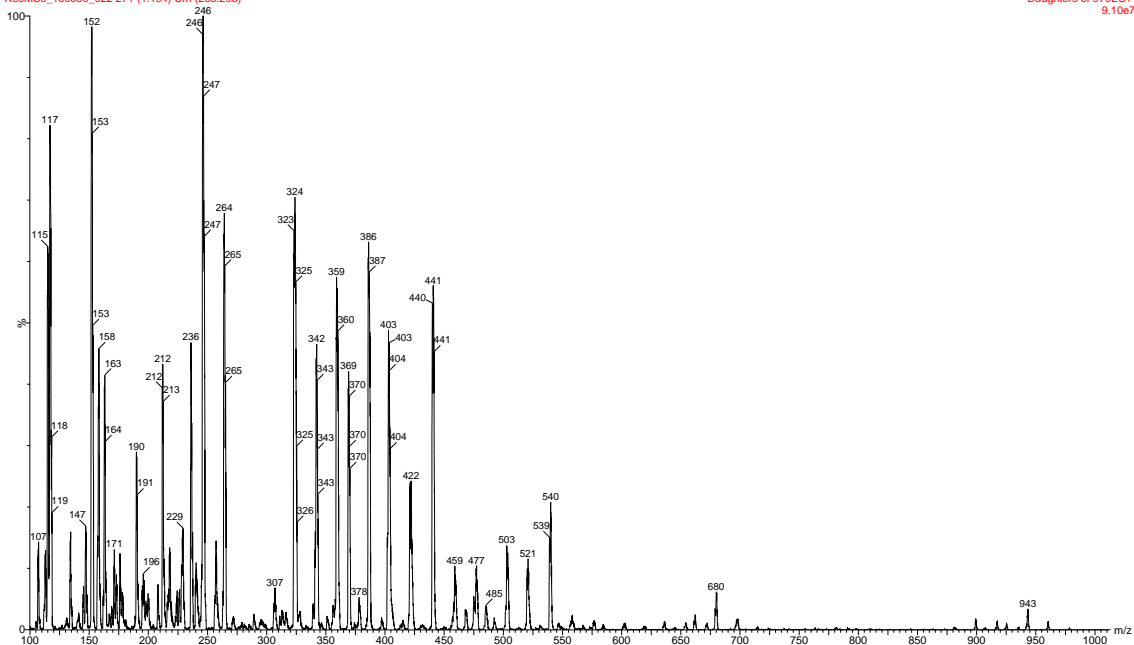

MS/MS spectrum of the 978.5 ion at 1.20 min from SV-75 (CE=45 V).

SV-75 (May 15) - MS2-1009.6 - CE 45  
ResMCs\_150530\_023 347 (1.389) Cm (342:361)

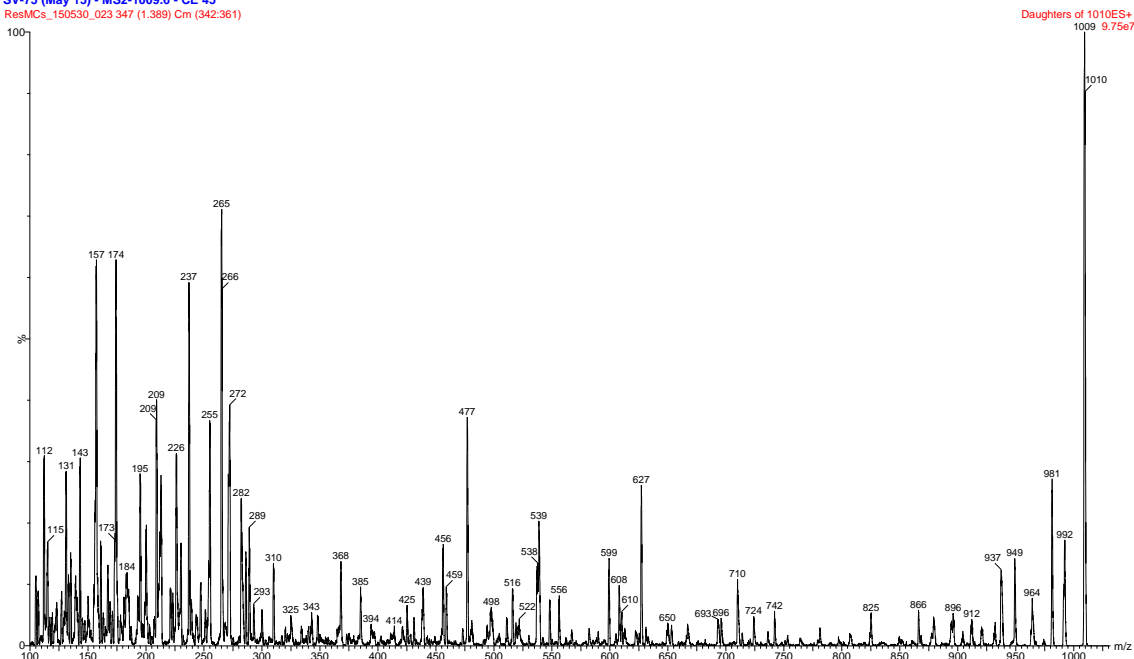

MS/MS spectrum of the 1009.6 [M+H]<sup>+</sup> ion at 1.40 min from SV-75 (CE=45 V).

SV-75 (May 15) - MS2-1083.6 - CE 45  
ResMCs\_150530\_024 429 (1.599) Cm (420:440)

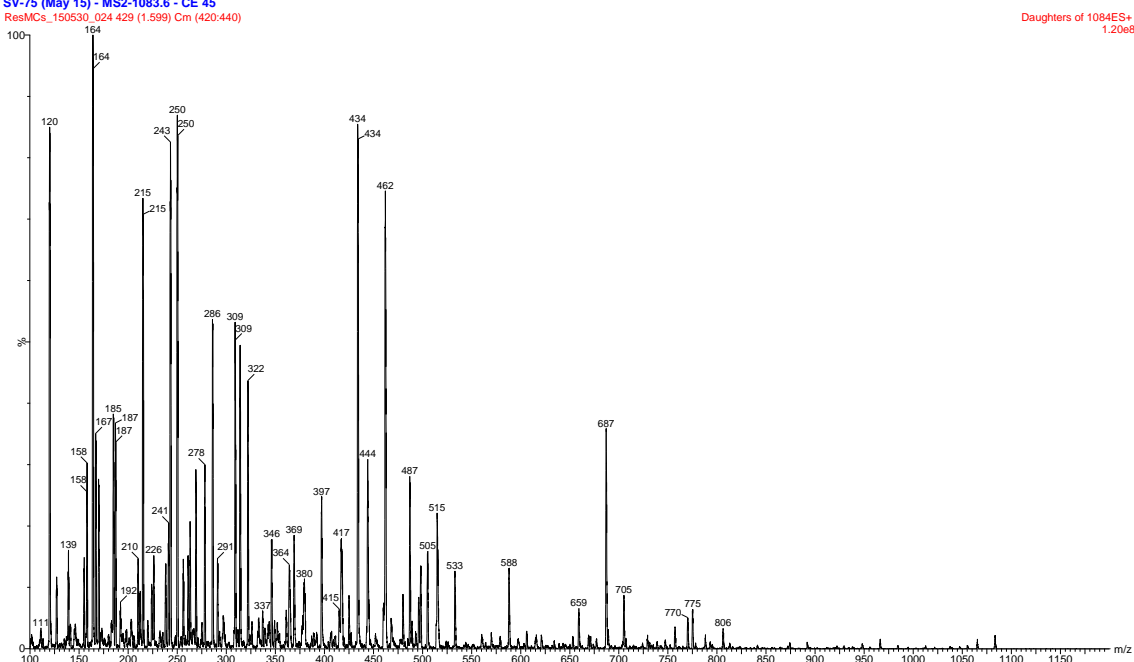

MS/MS spectrum of the 1083.9 ion at 1.60 min from SV-75 (CE=45 V).

## SV-75 (May 15) - MS2-1084.5 - CE 45

ResMCs\_150530\_025 455 (1.666) Cm (449:464)

Daughters of 1085ES+  
1.04e8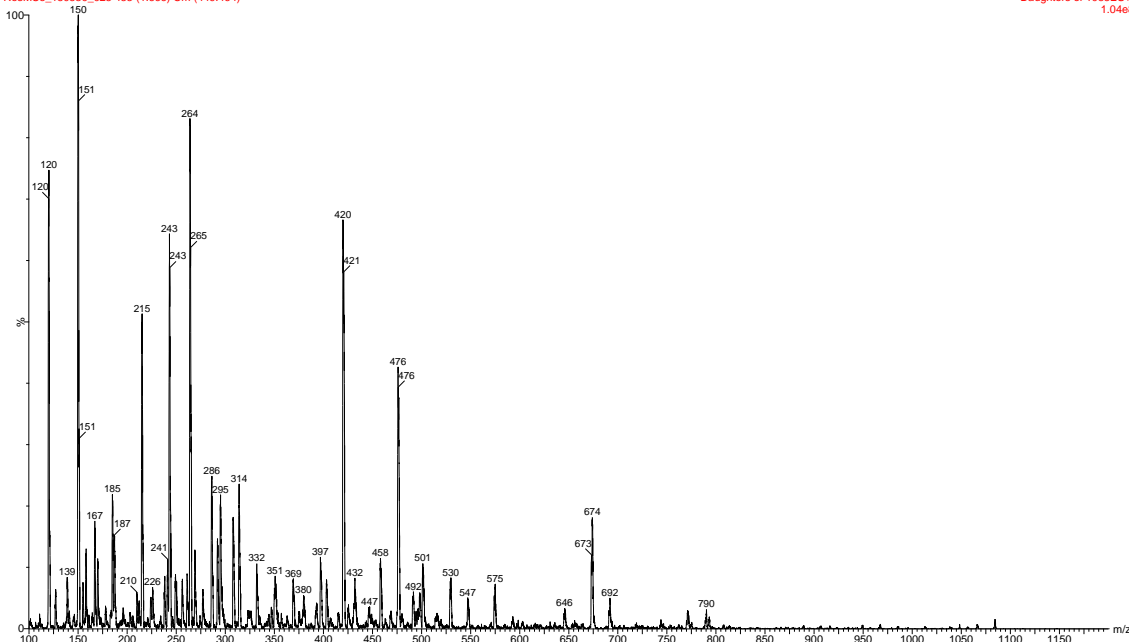

MS/MS spectrum of the 1084.4 ion at 1.68 min from SV-75 (CE=45 V).

## SV-75 (May 15) - MS2-1098.6 - CE 45

ResMCs\_150530\_026 603 (2.045) Cm (595:611)

Daughters of 1099ES+  
1.29e8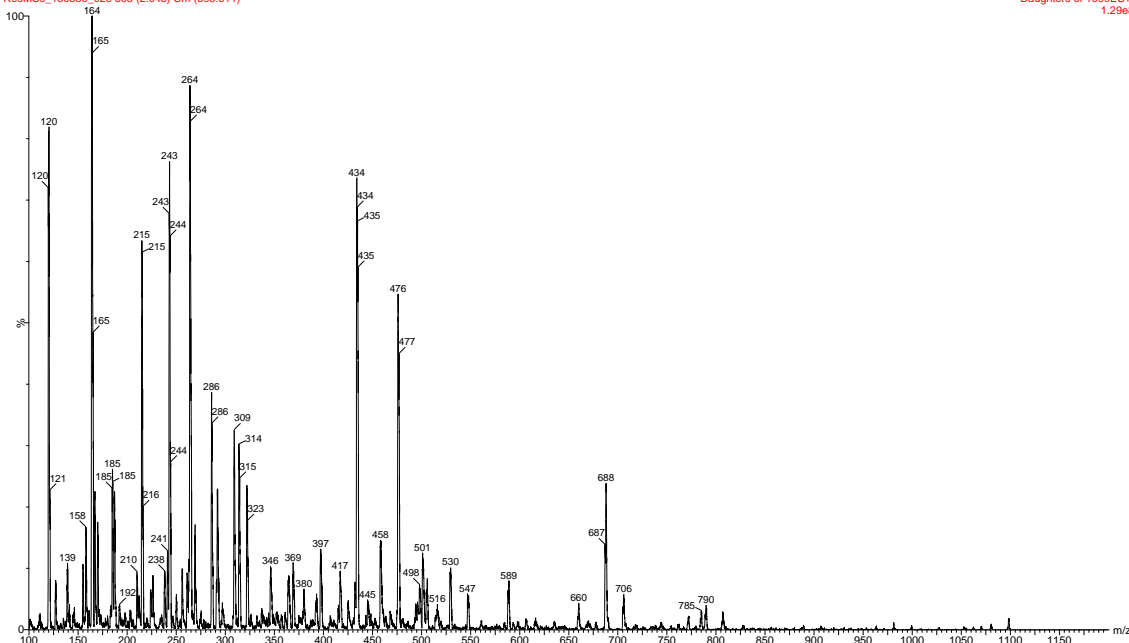

MS/MS spectrum of the 1098.7 ion at 2.05 min from SV-75 (CE=45 V).

## Environmental Sample SV-80

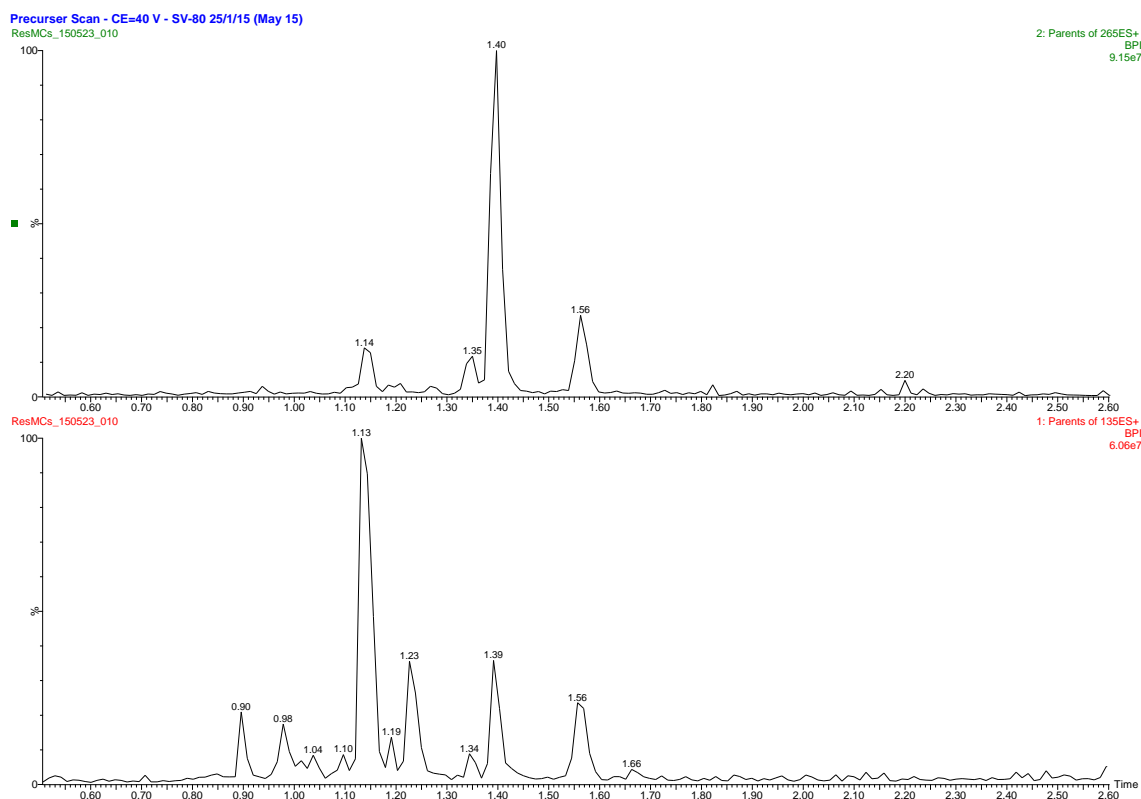

Base-peak chromatogram of the precursor ion scan for SV-80 (CE=40 V).

| RT <sup>a</sup><br>(min) | Prod. <sup>b</sup> | m/z <sup>c</sup> | M <sub>r</sub> <sup>d</sup><br>(Da) | Identity                                                               | Comments                                                                        |
|--------------------------|--------------------|------------------|-------------------------------------|------------------------------------------------------------------------|---------------------------------------------------------------------------------|
| 0.90                     | 135                | 514.6            | 1027.5                              | [Asp <sup>3</sup> , Ser <sup>7</sup> ] MC-RR                           | MS/MS confirmed the identity of the MC.                                         |
| 0.98                     | 135                | 505.4            | 1009.5                              | [Asp <sup>3</sup> , Dha <sup>7</sup> ] MC-RR                           | MS/MS used to confirm identity. Thiol derivatisation confirmed presence of Dha. |
| 1.13                     | 135/265            | 526.6/<br>1052.5 | 1051.6                              | [Asp <sup>3</sup> , ADMAdda <sup>5</sup> ,<br>Dhb <sup>7</sup> ] MC-RR | MS/MS used to confirm identity. Thiol derivatisation confirmed presence of Dhb. |
| 1.23                     | 135                | 550.2            | -                                   | Unknown                                                                | Tandem MS indicated that it was not a MC.                                       |
| 1.35                     | 265                | 1027.7           | 1026.5                              | [Asp <sup>3</sup> , ADMAdda <sup>5</sup> ,<br>Thr <sup>7</sup> ] MC-LR | MS/MS confirmed the identity of the MC.                                         |
| 1.39                     | 135/265            | 505.4/<br>1009.6 | 1008.5                              | [Asp <sup>3</sup> , ADMAdda <sup>5</sup> ,<br>Dhb <sup>7</sup> ] MC-LR | MS/MS used to confirm identity. Thiol derivatisation confirmed presence of Dhb. |
| 1.56                     | 135/265            | 1114.6           | -                                   | Unknown                                                                | Tandem MS indicated that it was not a MC.                                       |

<sup>a</sup> RT = Retention time on a Waters Acquity BEH-C<sub>18</sub> UPLC column (2.1×50 mm; 1.7-μm). <sup>b</sup> Product ion trace in which the precursor ion was identified (m/z 135 for Adda-containing compounds or m/z 265 for ADMAdda-containing compounds). <sup>c</sup> m/z = Mass-to-charge ratio of precursor ion. <sup>d</sup> M<sub>r</sub> = Molecular weight of the identified precursor ion.



SV-80 (25/01/15) - MS2-514.6 - CE 25  
SV-80 - MS2-514 155 (0.897) Cm (153:162)

Daughters of 515ES+  
3.31e7

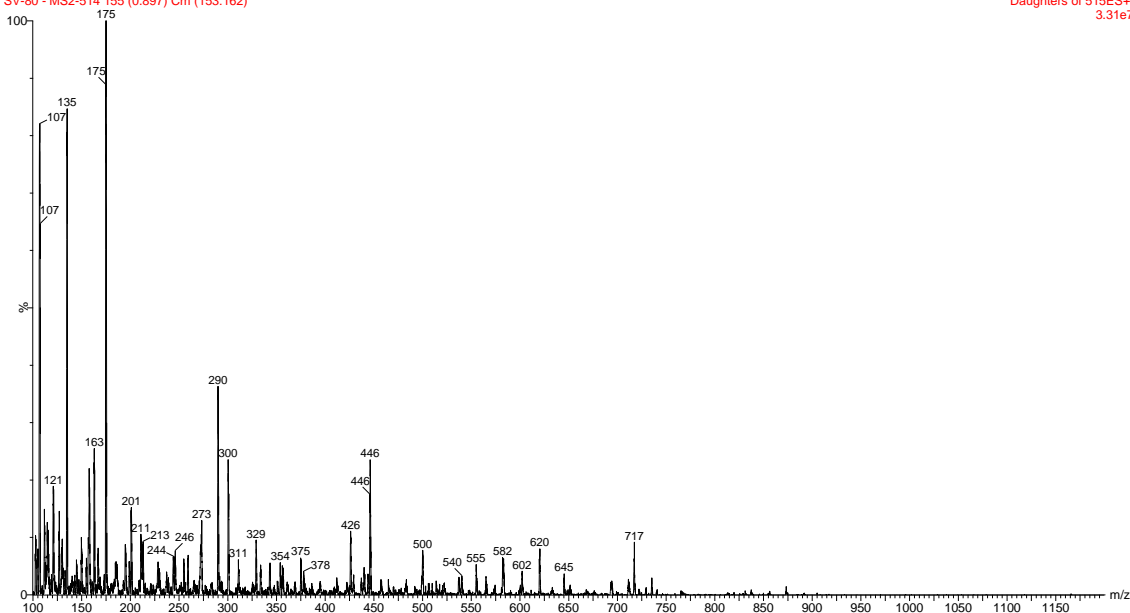

MS/MS spectrum of the 514.6  $[M+2H]^{2+}$  ion at 0.90 min from SV-80 (CE=25-30 V).

SV-80 (25/01/15) - MS2-505.4 - CE 25  
SV-80 - MS2-505 187 (0.979) Cm (184:197)

Daughters of 505ES+  
2.31e7

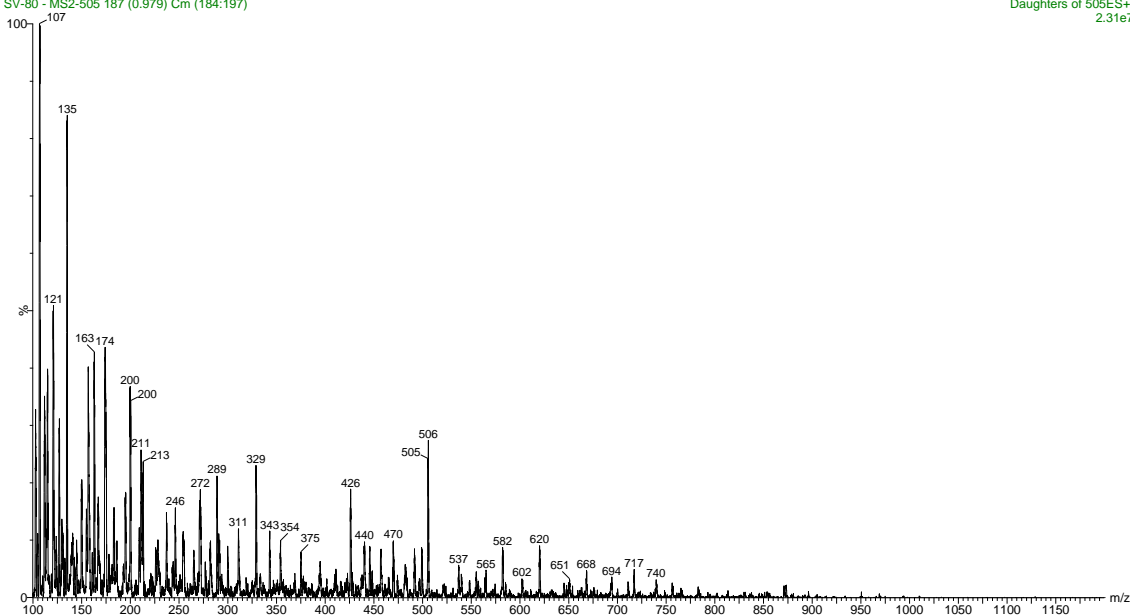

MS/MS spectrum of the  $m/z$  505.4  $[M+2H]^{2+}$  ion at 0.98 min from SV-80 (CE=25-30 V).

## SV-80 (25/01/15) - MS2-526.6 - CE 25

SV-80 - MS2-526 247 (1.133) Cm (241:261)

Daughters of 527ES+  
1.11e8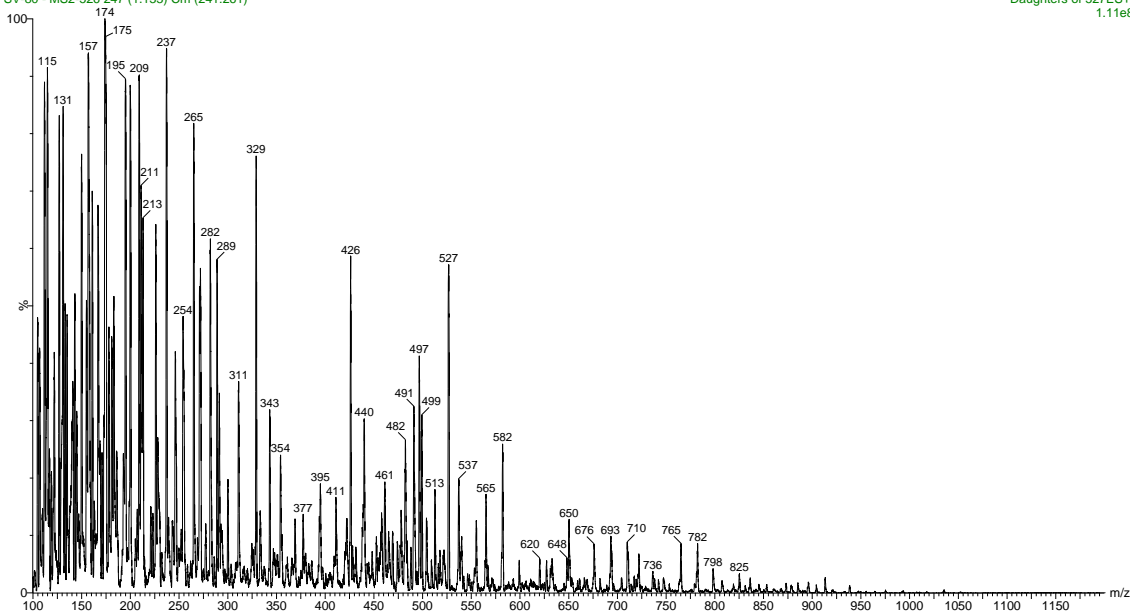MS/MS spectrum of the  $m/z$  526.6  $[M+2H]^{2+}$  ion at 1.13 min from SV-80 (CE=25-30 V).

## SV-80 (25/01/15) - MS2-1052.5 - CE 45

ResMCs\_150822\_020 247 (1.133) Cm (241:260)

Daughters of 1052ES+  
1.10e8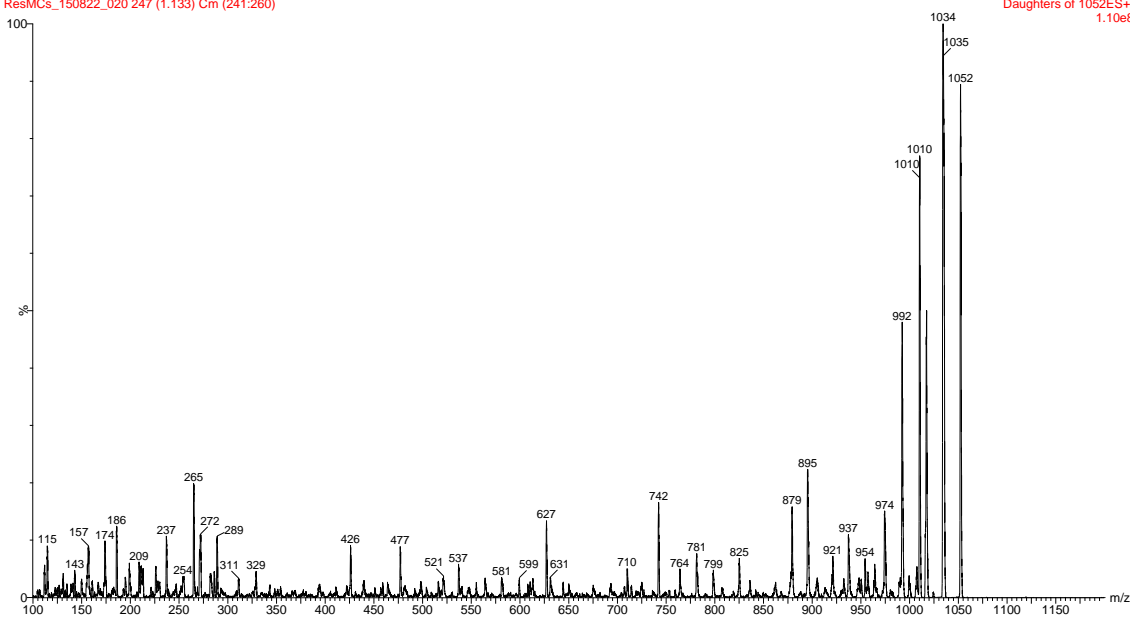MS/MS spectrum of the  $m/z$  1052.5  $[M+H]^+$  ion at 1.13 min from SV-80 (CE=45 V).

## SV-80 (25/01/15) - MS2-550.2 - CE 25

SV-80 - MS2-550 285 (1.230) Cm (274:297)

Daughters of 550ES+  
9.46e7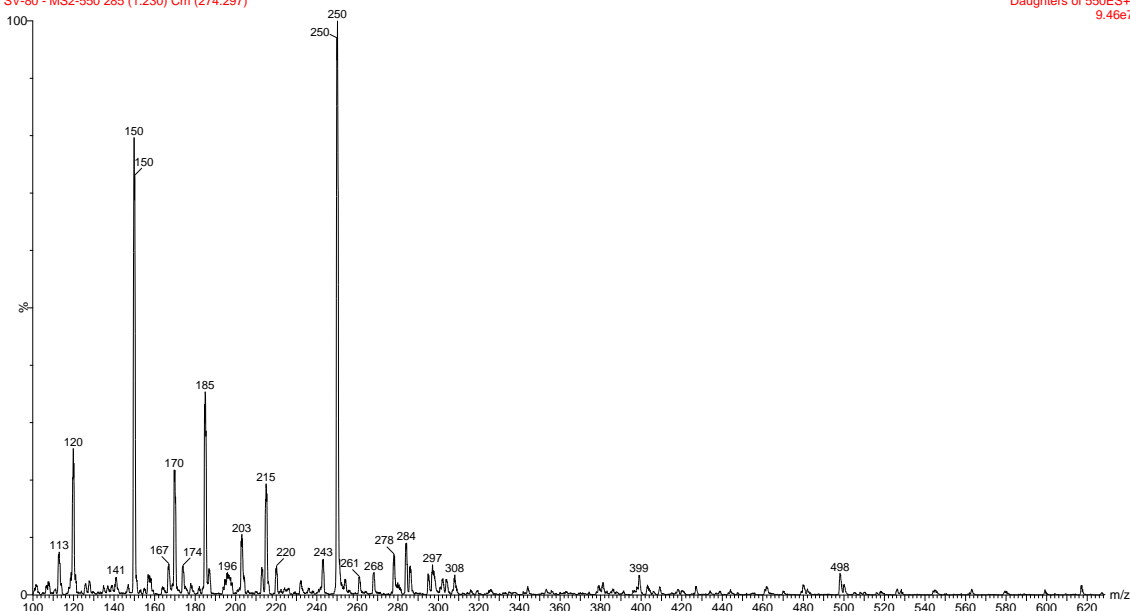MS/MS spectrum of the  $m/z$  550.2 ion at 1.23 min from SV-80 (CE=25-30 V).

## SV-80 (25/01/15) - MS2-1027.7 - CE 45

ResMCs\_150822\_023 323 (1.328) Cm (318:337)

Daughters of 1028ES+  
7.21e7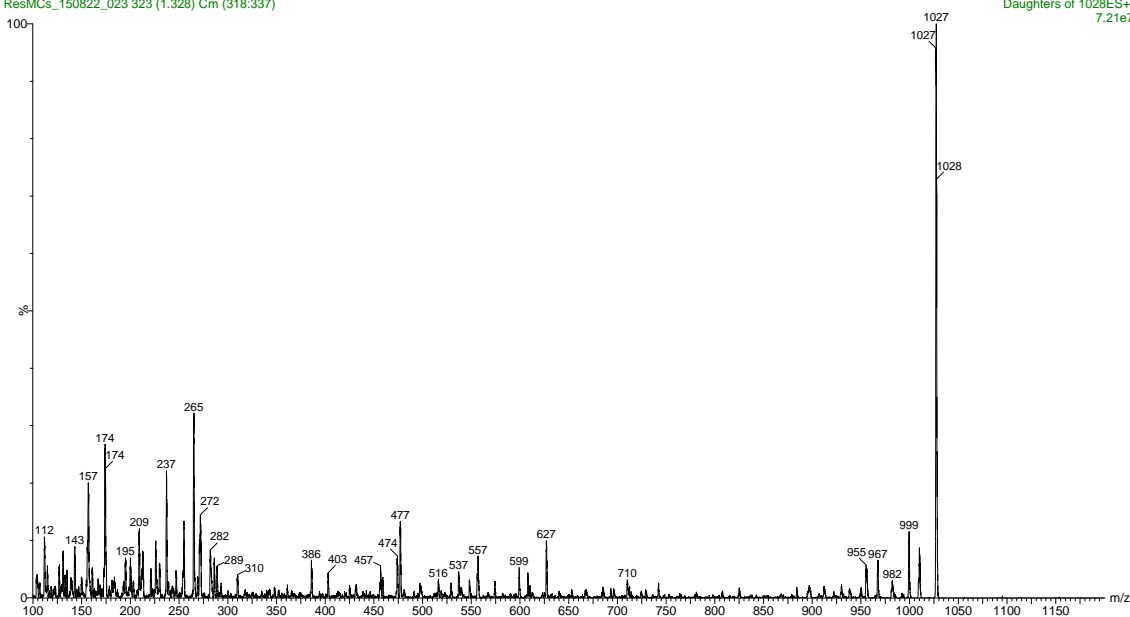MS/MS spectrum of the  $m/z$  1027.7  $[M+H]^+$  ion at 1.35 min from SV-80 (CE=45 V).

SV-80 (25/01/15) - MS2-505.4 - CE 25  
SV-80 - MS2-505 341 (1.374) Cm (336:362)

Daughters of 505ES+  
5.00e7

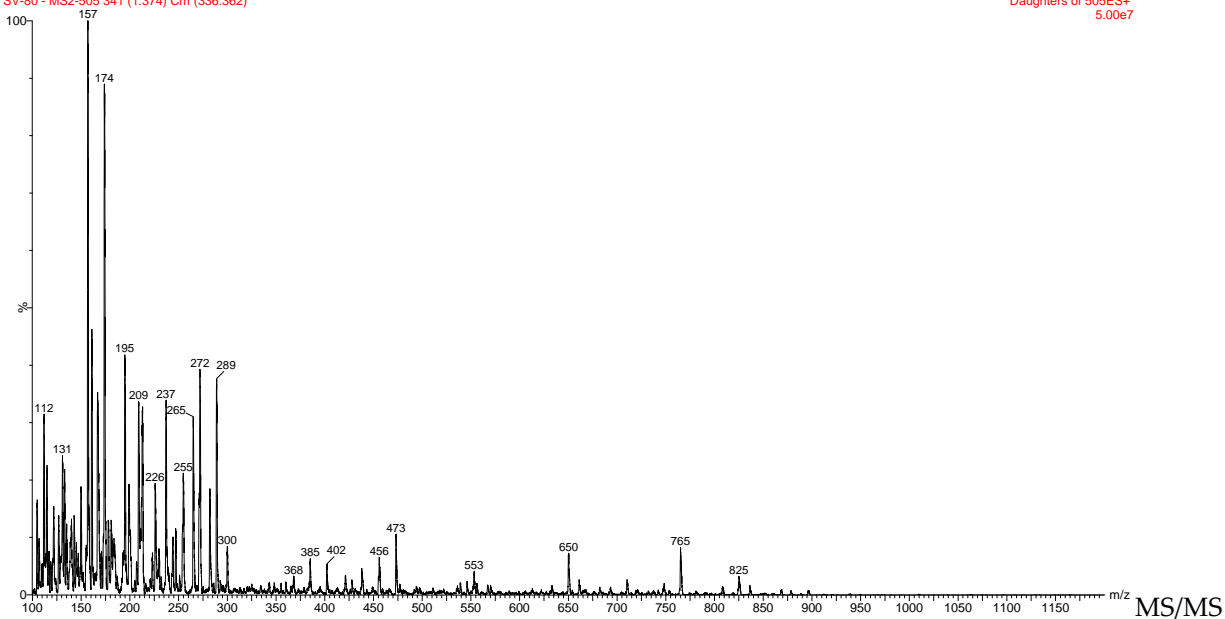

spectrum of the  $m/z$  505.4  $[M+2H]^{2+}$  ion at 1.39 min from SV-80 (CE=25-30 V).

SV-80 (25/01/15) - MS2-1009.6 - CE 45  
ResMCs\_150822\_024 342 (1.376) Cm (336:360)

Daughters of 1010ES+  
1.34e8

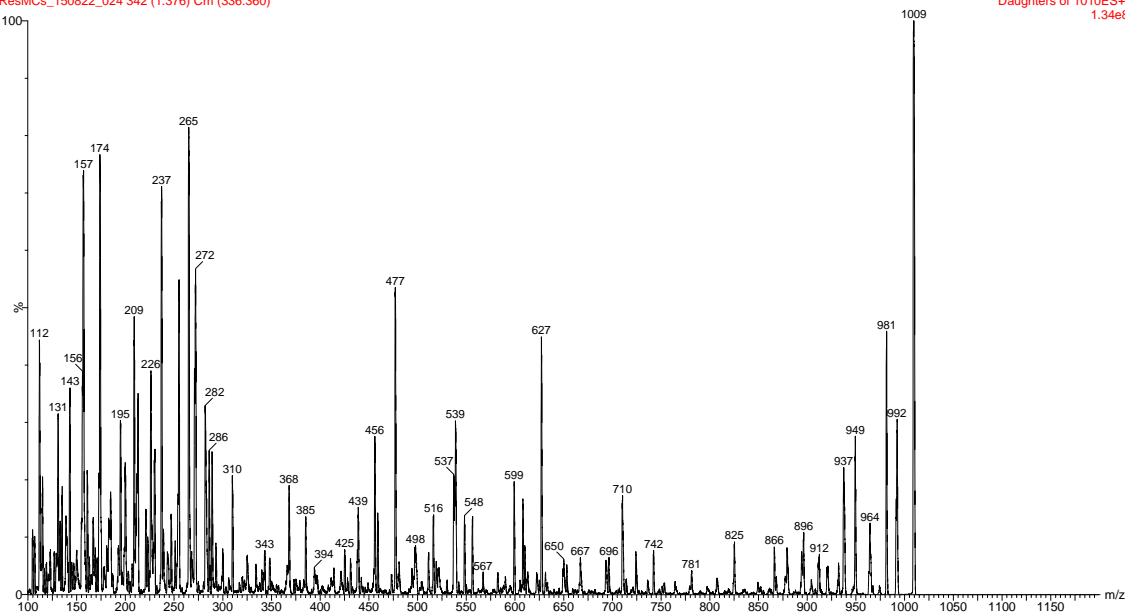

MS/MS spectrum of the  $m/z$  1009.6  $[M+H]^+$  ion at 1.39 min from SV-80 (CE=45 V).

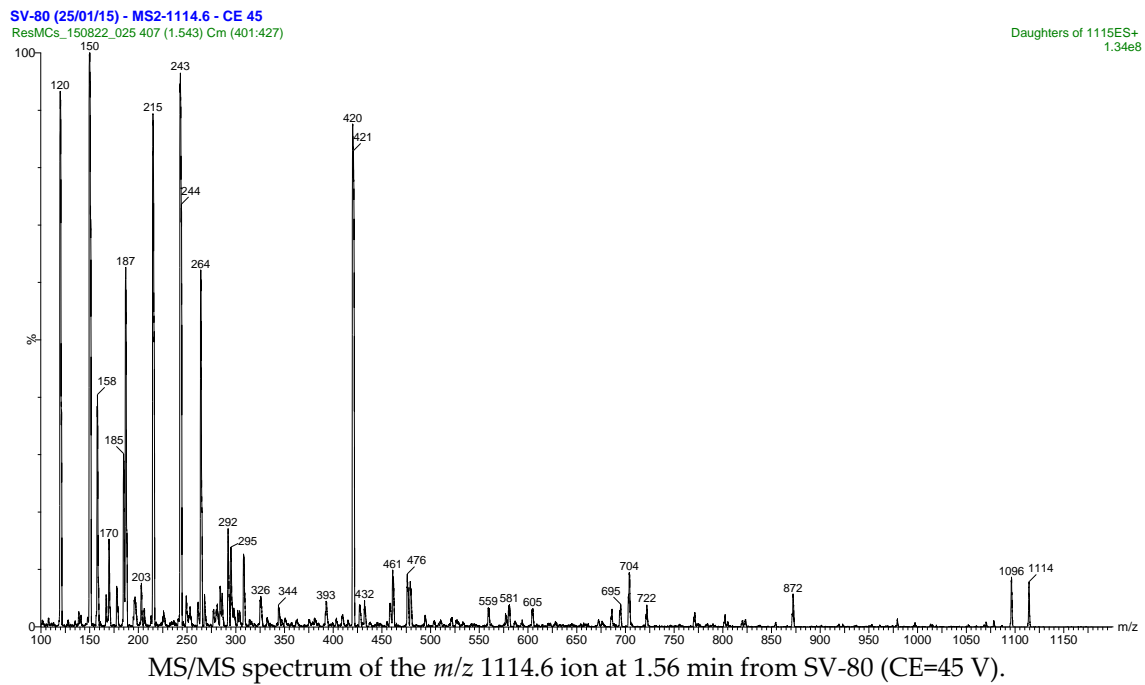

## Environmental Sample SV-81

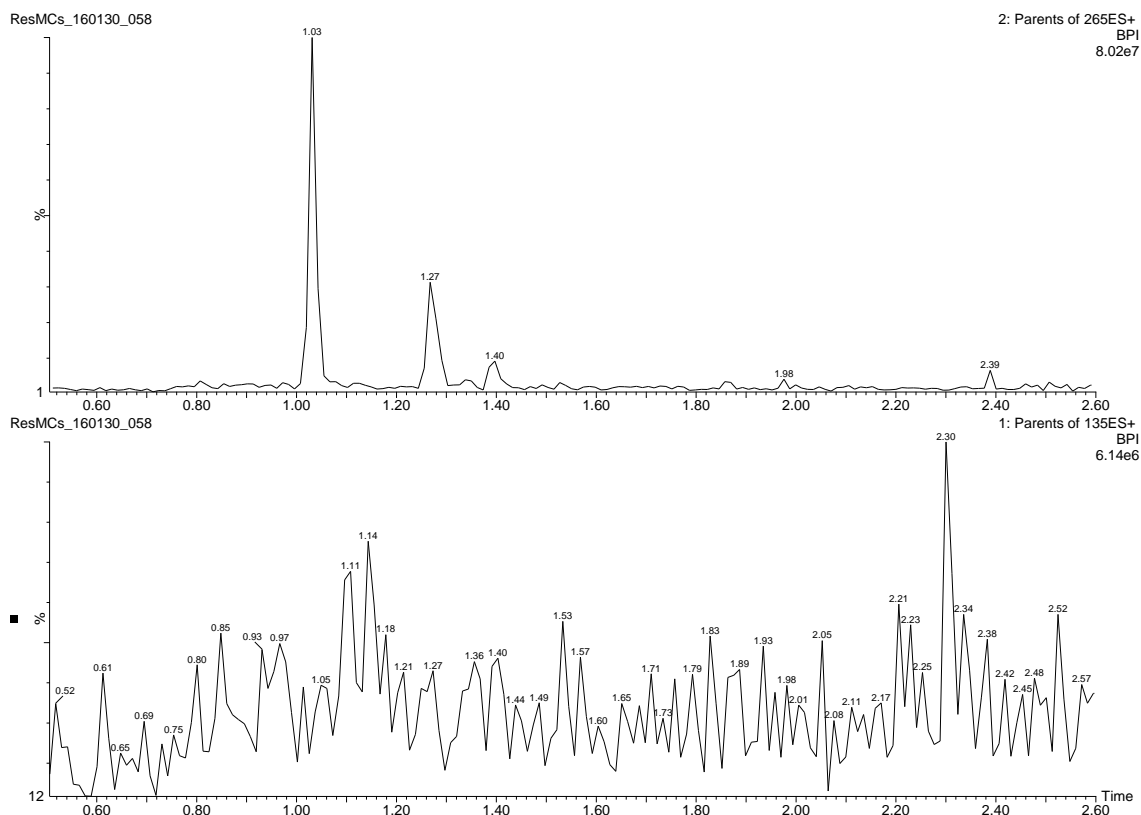

Base-peak chromatogram of the precursor ion scan for SV-81 (CE=40 V).

| RT <sup>a</sup><br>(min) | Prod. <sup>b</sup> | m/z <sup>c</sup> | M <sub>r</sub> <sup>d</sup><br>(Da) | Identity                                                             | Comments                                                                        |
|--------------------------|--------------------|------------------|-------------------------------------|----------------------------------------------------------------------|---------------------------------------------------------------------------------|
| 1.03                     | 265                | 733.2            | -                                   | Unknown                                                              | Unlikely to be a microcystin because of retention time in conjunction with m/z. |
| 1.27                     | 265                | 801.3            | -                                   | Unknown                                                              | Unlikely to be a microcystin because of retention time in conjunction with m/z. |
| 1.40                     | 265                | 1009.7           | 1008.5                              | [Asp <sup>3</sup> , ADMAAdda <sup>5</sup> , Dhb <sup>7</sup> ] MC-LR | MS/MS used to confirm identity. Thiol derivatisation confirmed presence of Dhb. |
| 1.98                     | 265                | 674.3            | -                                   | Unknown                                                              | Unlikely to be a microcystin because of retention time in conjunction with m/z. |
| 2.30                     | 135                | 819.6            | -                                   | Unknown                                                              | Unlikely to be a microcystin because of retention time in conjunction with m/z. |
| 2.39                     | 265                | 551.9            | -                                   | Unknown                                                              | Unlikely to be a microcystin because of retention time in conjunction with m/z. |

<sup>a</sup> RT = Retention time on a Waters Acquity BEH-C<sub>18</sub> UPLC column (2.1×50 mm; 1.7-μm). <sup>b</sup> Product ion trace in which the precursor ion was identified (m/z 135 for Adda-containing compounds or m/z 265 for ADMAAdda-containing compounds). <sup>c</sup> m/z = Mass-to-charge ratio of precursor ion. <sup>d</sup> M<sub>r</sub> = Molecular weight of the identified precursor ion.

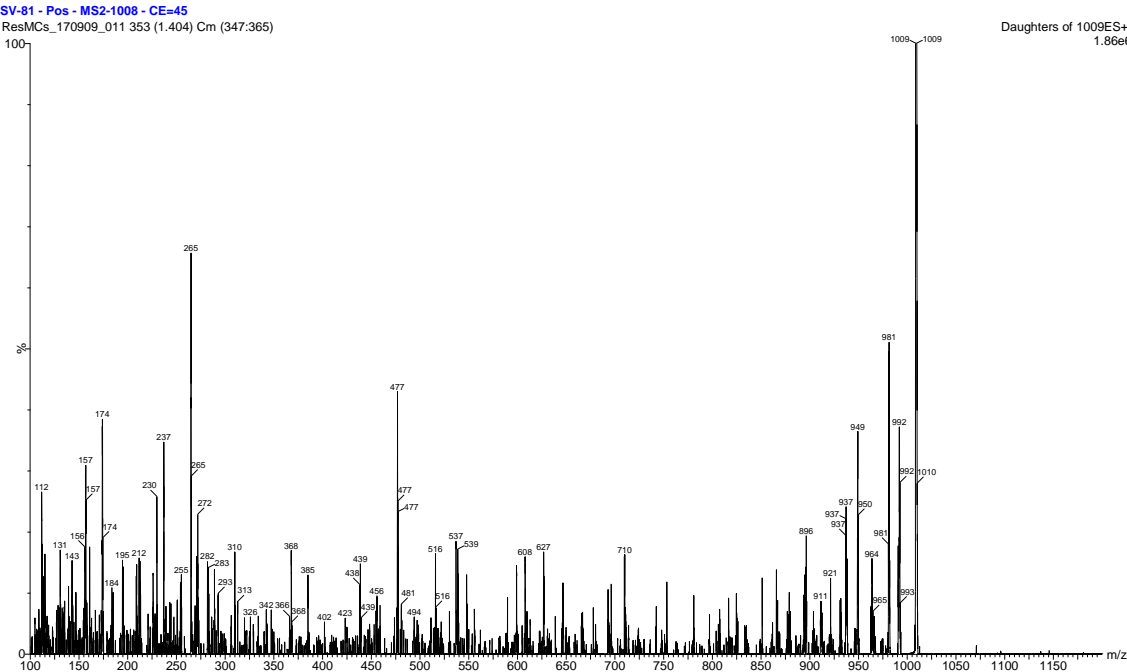

## Environmental Sample SV-83

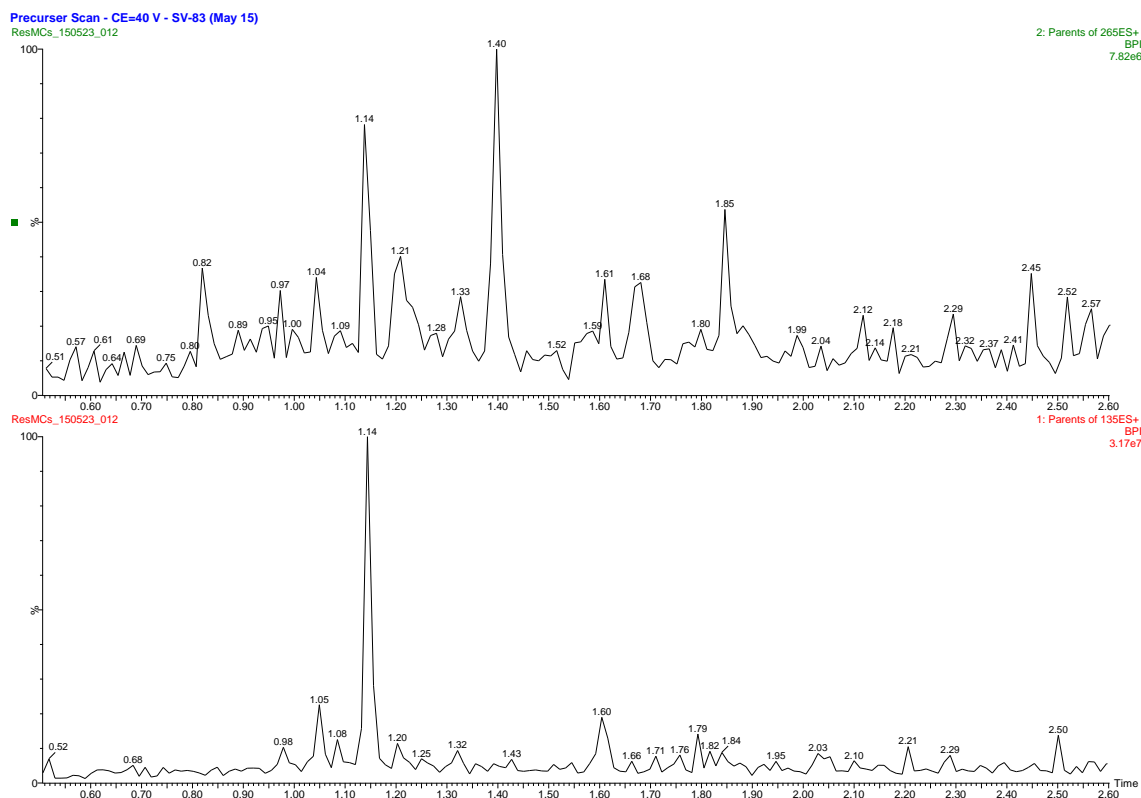

Base-peak chromatogram of the precursor ion scan for SV-83 (CE=40 V).

| RT <sup>a</sup><br>(min) | Prod. <sup>b</sup> | m/z <sup>c</sup> | Mr <sup>d</sup><br>(Da) | Identity                                                             | Comments                                                                             |
|--------------------------|--------------------|------------------|-------------------------|----------------------------------------------------------------------|--------------------------------------------------------------------------------------|
| 0.82                     | 265                | 589.3            | -                       | Unknown                                                              | Unlikely to be a microcystin because of retention time in conjunction with m/z.      |
| 1.04                     | 265                | 823.1            | -                       | Unknown                                                              | Unlikely to be a microcystin because of retention time in conjunction with m/z.      |
| 1.05                     | 135                | 825.1            | -                       | Unknown                                                              | Unlikely to be a microcystin because of retention time in conjunction with m/z.      |
| 1.14                     | 135/265            | 526.6            | 1051.5                  | [Asp <sup>3</sup> , ADMAAdda <sup>5</sup> , Dhb <sup>7</sup> ] MC-RR | MS/MS used to confirm identity. Thiol derivatisation confirmed presence of Dhb.      |
| 1.20                     | 265                | 978.5            | -                       | Unknown                                                              | Unlikely to be a microcystin because of retention time in conjunction with m/z.      |
| 1.21                     | 265                | 1053.3           | 1052                    | Unknown microcystin                                                  | MS/MS indicates it is a microcystin. Thiol derivatisation confirmed presence of Dhb. |
| 1.33                     | 265                | 995.3            | -                       | Unknown                                                              | Insufficient signal in MS/MS spectrum.                                               |
| 1.40                     | 265                | 1009.8           | 1008.5                  | [Asp <sup>3</sup> , ADMAAdda <sup>5</sup> , Dhb <sup>7</sup> ] MC-LR | MS/MS used to confirm identity. Thiol derivatisation confirmed presence of Dhb.      |
| 1.60                     | 135                | 809.3            | -                       | Unknown                                                              | Unlikely to be a microcystin because of retention time in conjunction with m/z.      |
| 1.61                     | 265                | 1043.5           | -                       | Unknown                                                              | Tandem MS indicates it is not a microcystin.                                         |
| 1.61                     | 265                | 1025.2           | -                       | Unknown                                                              | Tandem MS indicates it is not a microcystin.                                         |
| 1.68                     | 265                | 1084.6           | -                       | Unknown                                                              | Tandem MS indicates it is not a microcystin.                                         |
| 1.85                     | 265                | 814.9            | -                       | Unknown                                                              | Unlikely to be a microcystin because of retention time in conjunction with m/z.      |

<sup>a</sup> RT = Retention time on a Waters Acquity BEH-C<sub>18</sub> UPLC column (2.1×50 mm; 1.7-μm). <sup>b</sup> Product ion trace in which the precursor ion was identified (m/z 135 for Adda-containing compounds or m/z 265 for ADMAAdda-containing compounds). <sup>c</sup> m/z = Mass-to-charge ratio of precursor ion. <sup>d</sup> Mr = Molecular weight of the identified precursor ion.



SV-83 (May 15) - MS2-526.6 - CE 25  
SV-83 - MS2-526 248 (1.136) Cm (245:259)

Daughters of 527ES+  
7.11e7

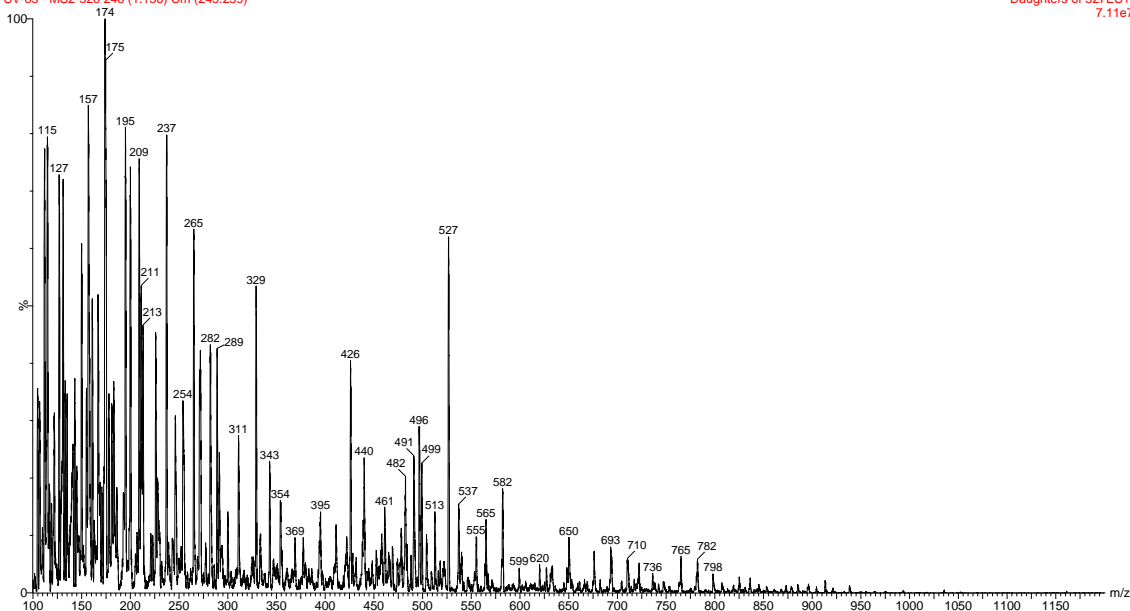

MS/MS spectrum of the  $m/z$  526.4  $[M+2H]^{2+}$  ion at 1.14 min from SV-83 (CE=25-30 V).

SV-83 (May 15) - MS2-1053.3 - CE 45  
ResMCs\_150822\_028 272 (1.197) Cm (268:287)

Daughters of 1053ES+  
2.29e7

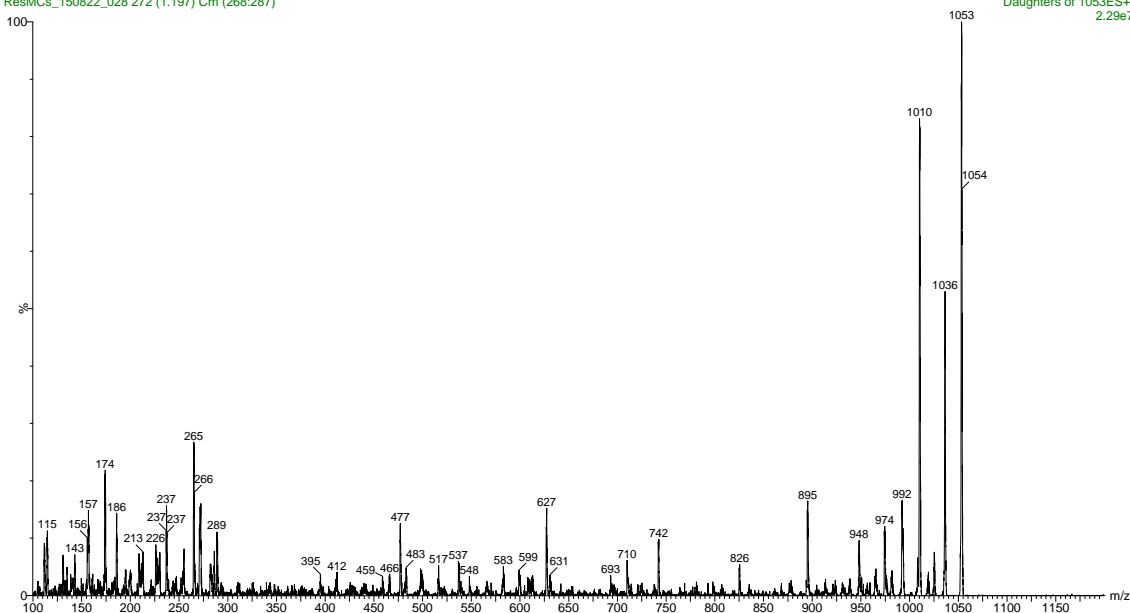

MS/MS spectrum of the  $m/z$  1053.3  $[M+H]^+$  ion at 1.21 min from SV-83 (CE=45 V).

SV-83 (May 15) - MS2-995.3 - CE 45  
ResMCs\_150822\_029 322 (1.325) Cm (313:324)

Daughters of 996ES+  
1.44e6

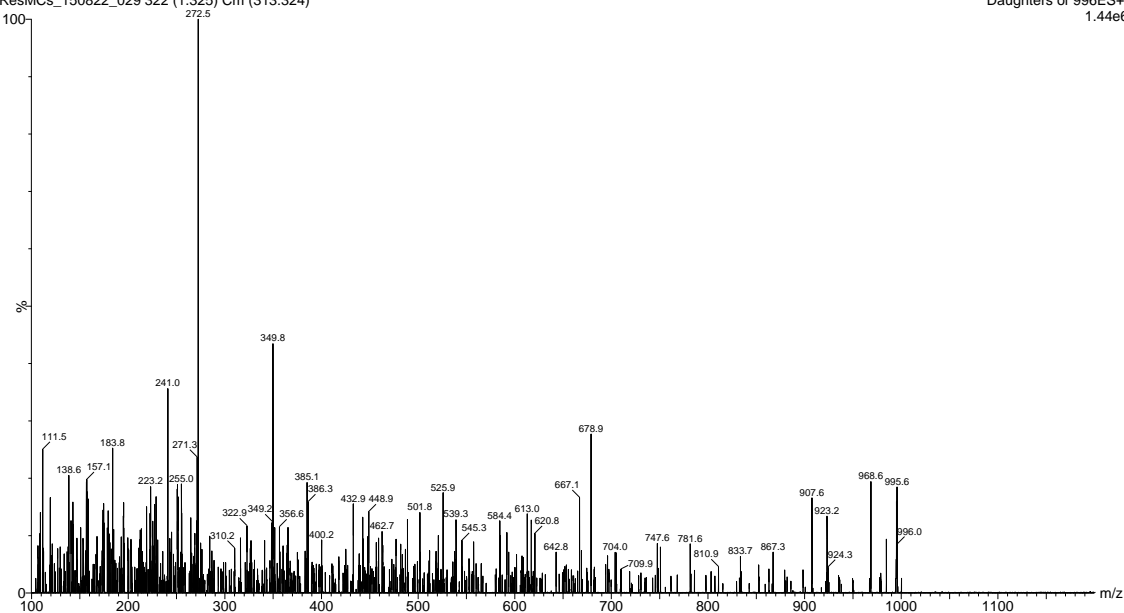

MS/MS spectrum of the  $m/z$  995.5 ion at 1.33 min from SV-83 (CE=45 V).

SV-83 (May 15) - MS2-1009.6 - CE 45  
ResMCs\_150822\_030 344 (1.382) Cm (339:357)

Daughters of 1010ES+  
5.44e7

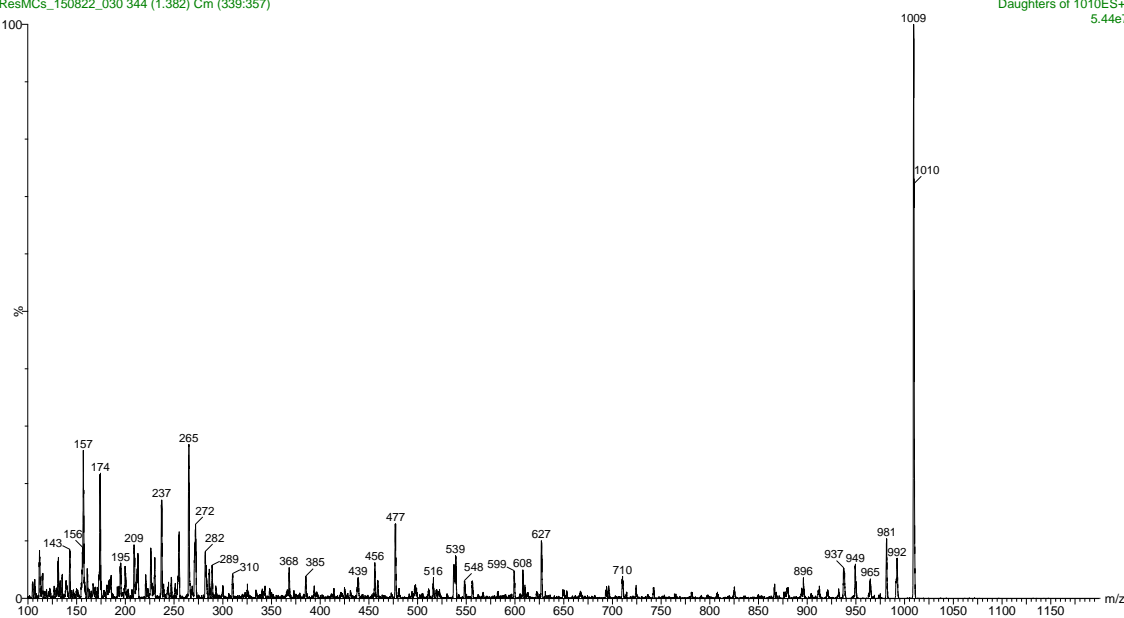

MS/MS spectrum of the  $m/z$  1009.6  $[M+H]^+$  ion at 1.40 min from SV-83 (CE=45 V).

SV-83 (May 15) - MS2-1025.2 - CE 45  
ResMCs\_150822\_031 426 (1.592) Cm (420:442)

Daughters of 1025ES+  
8.39e6

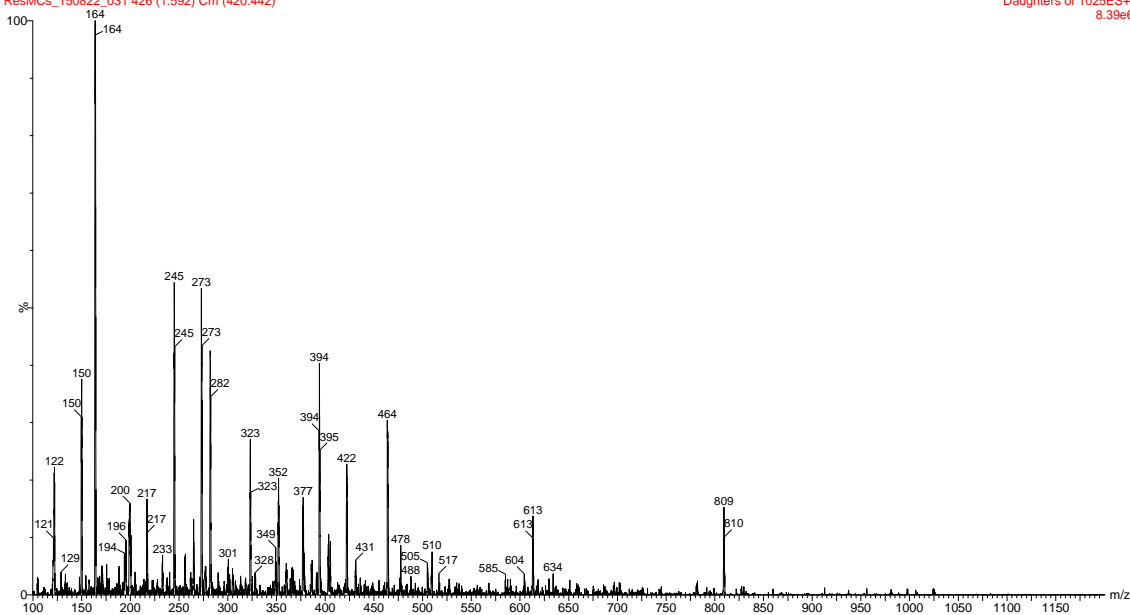

MS/MS spectrum of the  $m/z$  1025.2 ion at 1.61 min from SV-83 (CE=45 V).

SV-83 (May 15) - MS2-1043.5 - CE 45  
ResMCs\_150822\_032 426 (1.592) Cm (417:443)

Daughters of 1044ES+  
2.24e7

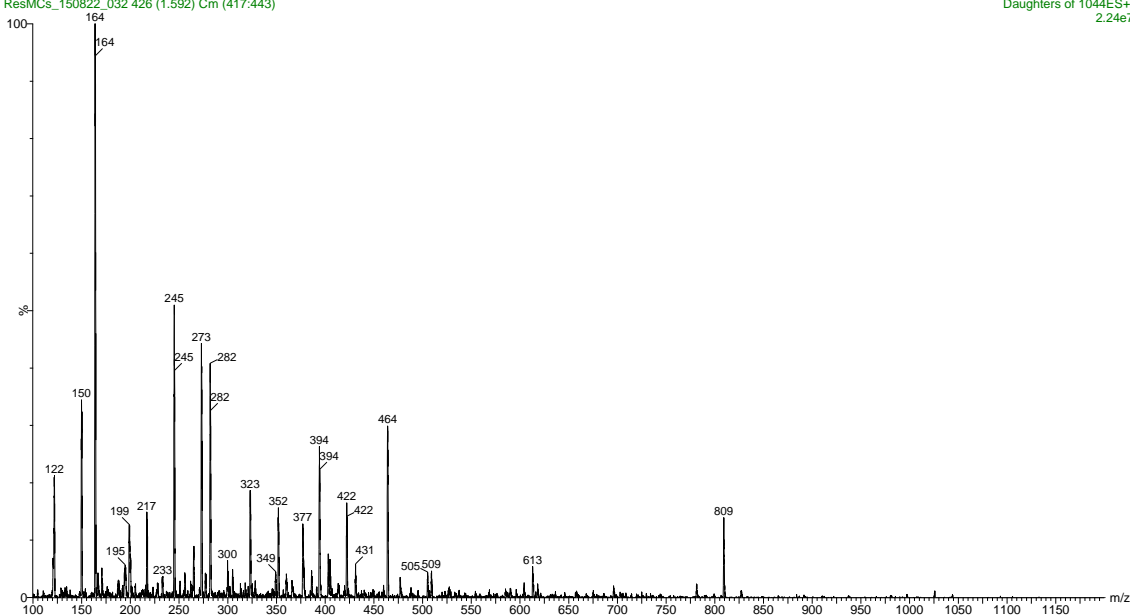

MS/MS spectrum of the  $m/z$  1043.5 ion at 1.61 min from SV-83 (CE=45 V).

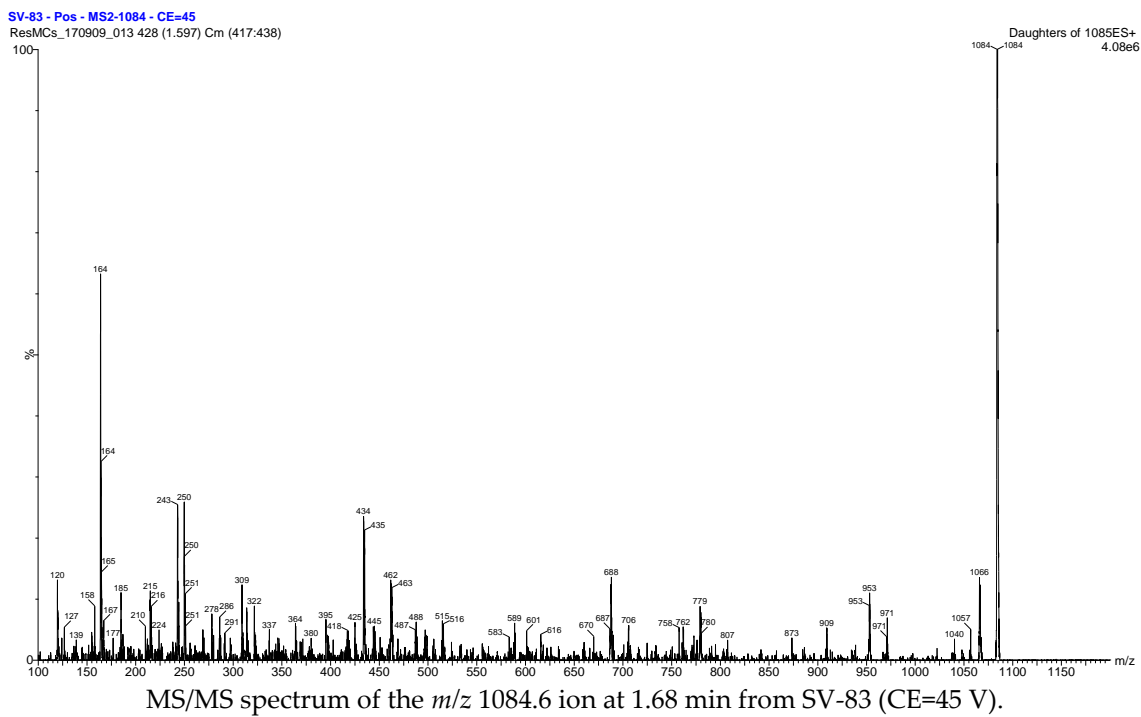

Supplement: s1 [file s1]
