# Supplementary material for: Toxic Cyanobacteria in Svalbard: Chemical Diversity of Microcystins Detected Using a Liquid Chromatography Mass Spectrometry Precursor Ion Screening Method
Source: MDPI journal article supplement (doi:10.3390/toxins10040147), 2018-04-03
Supplement: s1 [file s1]

# Supplementary Materials: Toxic cyanobacteria in Svalbard: Chemical diversity of microcystins detected using a liquid chromatography mass spectrometry precursor ion screening method

Julia Kleinteich, Jonathan Puddick, Susanna A. Wood, Falk Hildebrand, H. Dail Laughinghouse IV, David A. Pearce, Daniel R. Dietrich and Annick Wilmotte

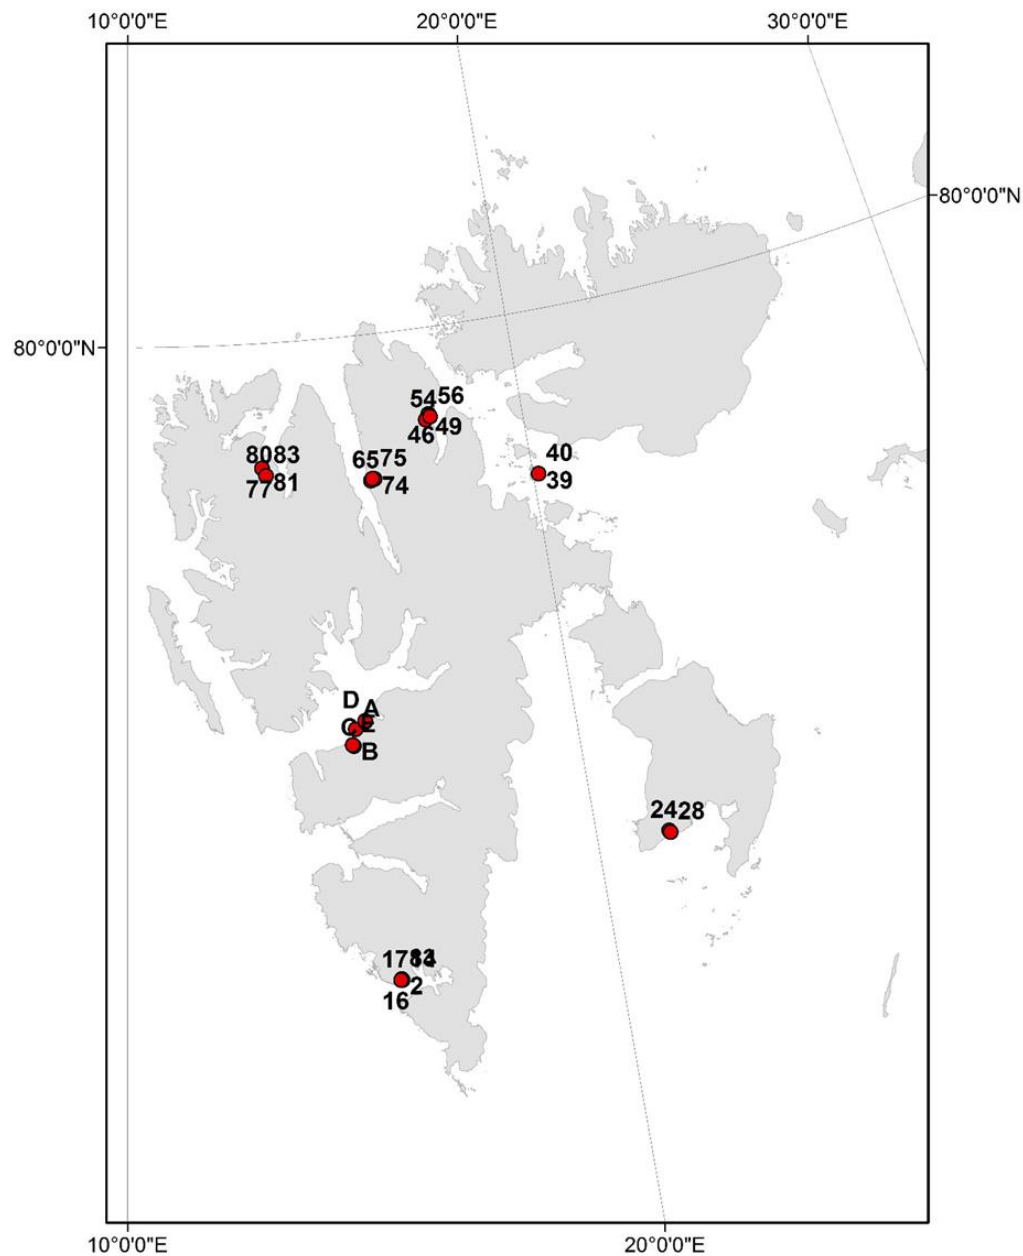

Figure S1: Map of Svalbard and sampling locations used. Numbers and letters indicate the identity and location of each sample as described in Table S1 below.

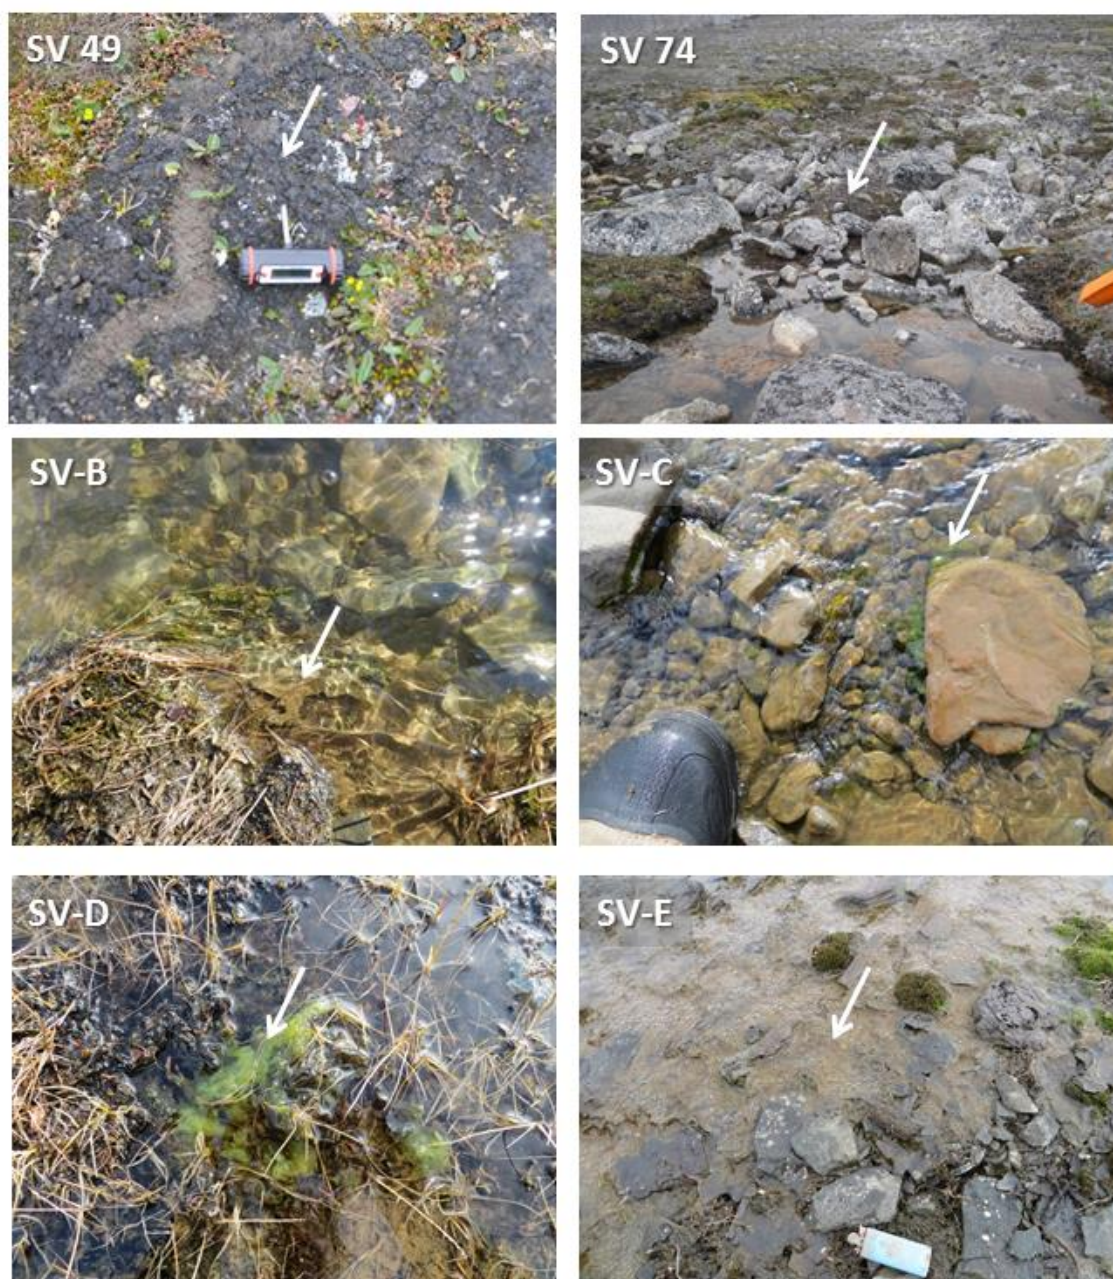

Figure S2: *In-situ* photographs of some cyanobacterial mats sampled in freshwater habitats of Svalbard. Cyanobacterial mats are indicated by arrows.

Table S1: Metadata. GPS coordinates, sampling date and description for each sample.

| Sample               | Sampling date | GPS coordinates                | Site and sample description                                          |
|----------------------|---------------|--------------------------------|----------------------------------------------------------------------|
| SV A                 | 7.6.2012      | N 78°11'17.4"<br>E 15°05'49.2" | Colesbukta - Marshy land, <i>Nostoc</i> colony between moss cushions |
| SV B                 | 6.6.2012      | N 78°06'42.6"<br>E 15°01'41.1" | Colesbukta - Stream sample                                           |
| SV C                 | 13.6.2012     | N 78°13'08.1"<br>E 15°19'40.4" | Björndalen - Stream sample, green biofilm                            |
| SV D <sup>N</sup>    | 13.6.2012     | N 78°13'23.3"<br>E 15°19'39.8" | Björndalen - Marshy land, <i>Nostoc</i> colony between moss cushions |
| SV E <sup>N</sup>    | 7.6.2012      | N 78°07'03.0"<br>E 15°0'13.1"  | Colesbukta - Stream sample – orange mat                              |
| SV 2                 | 02.07.2013    | N 77°00'42.9"<br>E 15°35'42.9" | Not available                                                        |
| SV 8                 | 02.07.2013    | N 77°01'00.1"<br>E 15°34'52.7" | Brown mucilaginous filament                                          |
| SV 13                | 02.07.2013    | N 77°01'00.1"<br>E 15°34'52.7" | Green biofilm                                                        |
| SV 14                | 02.07.2013    | N 77°00'51.1"<br>E 15°35'09.9" | Orange biofilm in small seepage                                      |
| SV 16                | 02.07.2013    | N 77°00'45.1"<br>E 15°33'57.1" | Puddle with bryophytes                                               |
| SV 17                | 02.07.2013    | N 77°00'45.1"<br>E 15°33'57.1" | Puddle embayment in stream                                           |
| SV 24                | 07.04.2013    | N 77°30'53.3"<br>E 21°31'21.1" | Red soil crust, humid, soft                                          |
| SV 28                | 04.07.2013    | N 77°30'23.3"<br>E 21°32'42.6" | Rugous dry biofilm in dry river bed                                  |
| SV 39                | 06.07.2013    | N 79°14'59.3"<br>E 20°08'06.9" | Microbial mat in swampy area                                         |
| SV 40 <sup>N</sup>   | 06.07.2013    | N 79°14'59.3"<br>E 20°08'06.9" | <i>Nostoc</i> soil mat                                               |
| SV 46                | 06.07.2013    | N 79°36'01.1"<br>E 17°38'49.9" | Crust, black                                                         |
| SV 49 <sup>N</sup>   | 06.07.2013    | N 79°35'39.9"<br>E 17°38'02.9" | Wet, <i>Nostoc</i> colonies                                          |
| SV 54                | 06.07.2013    | N 79°34'31.8"<br>E 17°33'36.6" | Biofilm on the side of moraine lake                                  |
| SV 56 <sup>N</sup>   | 06.07.2013    | N 79°35'17.7"<br>E 17°40'41.8" | <i>Nostoc</i> communities on cliff                                   |
| SV 65                | 07.07.2013    | N 79°19'34.2"<br>E 16°01'14.9" | Lake 200×50 m; Biofilm sample (20 cm depth)                          |
| SV 74 <sup>N</sup>   | 07.07.2013    | N 79°19'56.6"<br>E 16°06'55.3" | <i>Nostoc</i> in dried wetland                                       |
| SV 75 <sup>N</sup>   | 07.07.2013    | N 79°20'02.7"<br>E 16°03'46.7" | Floating mat in wetlands; brown                                      |
| SV 77                | 08.07.2013    | N 79°25'27.2"<br>E 13°20'53.3" | Floating mat in puddle                                               |
| SV 80 <sup>H</sup>   | 08.07.2013    | N 79°23'17.9"<br>E 13°26'21.3" | Hotspring sample                                                     |
| SV 81 <sup>H,E</sup> | 08.07.2013    | N 79°23'17.9"<br>E 13°26'21.3" | Hotspring sample, endolithic                                         |
| SV 83 <sup>H</sup>   | 08.07.2013    | N 79°23'17.9"<br>E 13°26'21.3" | Hotspring sample                                                     |

<sup>N</sup> Dominated by *Nostoc* sp.; <sup>H</sup> Hot spring; <sup>E</sup> Endolithic.

**Table S2:** Evaluation of the microcystin precursor ion screen. Data on dereplication benefits from using the precursor scan method for identifying potential microcystins in environmental extracts. n.a. = sample not analysed in the MS/MS analysis.

| Sample | Number of Peaks   |                    | MS/MS analyses conducted | Microcystins identified |
|--------|-------------------|--------------------|--------------------------|-------------------------|
|        | Positive ion scan | Precursor ion scan |                          |                         |
| SV-A   | 12                | 6                  | 1                        | 0                       |
| SV-B   | 11                | 1                  | 0                        | n.a.                    |
| SV-C   | 14                | 1                  | 0                        | n.a.                    |
| SV-D   | 15                | 7                  | 1                        | 1                       |
| SV-E   | 17                | 10                 | 0                        | n.a.                    |
| SV-02  | 17                | 4                  | 0                        | n.a.                    |
| SV-08  | 15                | 1                  | 0                        | n.a.                    |
| SV-13  | 15                | 3                  | 0                        | n.a.                    |
| SV-16  | 9                 | 6                  | 0                        | n.a.                    |
| SV-17  | 12                | 3                  | 2                        | 0                       |
| SV-49  | 11                | 6                  | 2                        | 1                       |
| SV-54  | 11                | 6                  | 0                        | n.a.                    |
| SV-56  | 8                 | 6                  | 0                        | n.a.                    |
| SV-74  | 7                 | 6                  | 3                        | 1                       |
| SV-75  | 13                | 8                  | 8                        | 2                       |
| SV-80  | 12                | 7                  | 7                        | 5                       |
| SV-81  | 18                | 6                  | 1                        | 1                       |
| SV-83  | 16                | 13                 | 7                        | 3                       |

Table S3: Amplified *mcyE*, *mcyB*, and *sxtA* sequences from cyanobacterial samples in Svalbard that corresponded to Category 1 in the LC-MS precursor ion screen. The length of the fragment, the closest cultured and uncultured hit in the GenBank database obtained by a BLAST (megablast for *mcyE*, blastn for *mcyB* and blastp for amino acid sequences based on nucleotide sequences translated with Geneious™), as well as the accession number of the newly obtained sequences.

| Sample | Sequence    | # bp | Highest uncultured match, geographic origin, accession # and pairwise identity | Highest cultured match, geographic origin, accession # and pairwise identity                           | Highest match amino acid sequence, geographic origin, accession # and pairwise identity                                              | GenBank Accession # |
|--------|-------------|------|--------------------------------------------------------------------------------|--------------------------------------------------------------------------------------------------------|--------------------------------------------------------------------------------------------------------------------------------------|---------------------|
| SV-D   | <i>mcyE</i> | 445  | Uncultured <i>Nostoc</i> sp. clone MVMG1, Antarctica, EU359046, 98%            | <i>Nostoc</i> sp. 152, Finland, microcystin synthetase gene cluster, KC699835, 93%                     | McyE, <i>Nostoc</i> sp. 152, Finland #AGZ05272.1, 97%                                                                                | MG838576            |
| SV-E   | <i>mcyE</i> | 467  | Uncultured cyanobacterium isolate <i>ndaF</i> gene, Finland, EU916784, 93%     | <i>Nostoc</i> sp. 152, Finland, microcystin synthetase gene cluster, KC699835, 94%                     | McyE, <i>Nostoc</i> sp. 152, Finland #AGZ05272.1, 97%                                                                                | MG838577            |
| SV75   | <i>mcyE</i> | 406  | Uncultured <i>Nostoc</i> sp. clone MVMG1, Antarctica, EU359046, 99%            | <i>Nostoc</i> sp. 152, Finland, microcystin synthetase gene cluster, KC699835, 94%                     | microcystin synthetase, uncultured <i>Nostoc</i> sp. Antarctica, #ABY66381.1, 99%                                                    | MG838573            |
| SV80   | <i>mcyE</i> | 330  | Uncultured <i>Nostoc</i> sp. clone MVMG1, Antarctica, EU359046, 98%            | <i>Nostoc</i> sp. 152, Finland, microcystin synthetase gene cluster, KC699835, 94%                     | microcystin synthetase, uncultured <i>Nostoc</i> sp. Antarctica, #ABY66381.1, 99%                                                    | MG838574            |
| SV81   | <i>mcyE</i> | 417  | Uncultured cyanobacterium isolate <i>ndaF</i> gene, Finland, EU916784, 93%     | <i>Nostoc</i> sp. 152, Finland, microcystin synthetase gene cluster, KC699835, 97%                     | methyltransferase domain-containing protein, <i>Nostoc</i> sp. 'Peltigera membranacea cyanobiont' 213, Iceland, #WP_094329291.1, 98% | MG838575            |
| SV-D   | <i>mcyB</i> | 728  | -                                                                              | <i>Microcoleus</i> sp. PCC 8701 clone 1 non-ribosomal peptide synthetase gene cluster, AY768451.2, 73% | non-ribosomal peptide synthetase <i>Phormidesmis priestleyi</i> , Antarctica #WP_073072318.1, 84%                                    | MG838581            |
| SV-75  | <i>mcyB</i> | 756  | -                                                                              | <i>Microcoleus</i> sp. PCC 8701 clone 1 non-ribosomal peptide synthetase gene cluster, AY768451.2, 73% | non-ribosomal peptide synthetase <i>Phormidesmis priestleyi</i> , Antarctica #WP_073072318.1, 83%                                    | MG838578            |
| SV-80  | <i>mcyB</i> | 758  | -                                                                              | <i>Microcoleus</i> sp. PCC 8701 clone 1 non-ribosomal peptide synthetase gene cluster, AY768451.2, 71% | non-ribosomal peptide synthetase <i>Phormidesmis priestleyi</i> , Antarctica #WP_073072318.1, 84%                                    | MG838579            |
| SV-81  | <i>mcyB</i> | 757  | -                                                                              | <i>Microcoleus</i> sp. PCC 8701 clone 1 non-ribosomal peptide synthetase gene cluster, AY768451.2, 71% | non-ribosomal peptide synthetase <i>Phormidesmis priestleyi</i> , Antarctica #WP_073072318.1, 84%                                    | MG838580            |
| SV75   | <i>sxtA</i> | 635  | Uncultured cyanobacterium clone, Arctic, JX887897, 100%                        | <i>Scytonema</i> sp. UCFS15 polyketide synthase ( <i>sxtA</i> ), JQ182302, 98%                         | -                                                                                                                                    | Not submitted       |

Table S4: Sequences of cyanobacterial OTUs (excluding chloroplasts) derived by 454 sequencing and their highest cultured and uncultured hit on GenBank (March 2018) based on pairwise similarity as well as the geographic origin of the sequences.

| OTU # | Sequence                                                                                                                                                                                                                                                                                                                                                                                                      | Similar sequences in GenBank                                                                                                                        | Geographic origin                     |
|-------|---------------------------------------------------------------------------------------------------------------------------------------------------------------------------------------------------------------------------------------------------------------------------------------------------------------------------------------------------------------------------------------------------------------|-----------------------------------------------------------------------------------------------------------------------------------------------------|---------------------------------------|
| OTU_1 | GAATCTACCTTCAGGACGGAGACAACAGTTGGAAACGACTGCTAACCCCGATGT<br>ACCGAAAGGGCAAATATTTATAGCCTGAAGAAGAGCTCGGTCGCGATTAGCTAGT<br>TGGAGAGGTAAGAGCTACCAAGGCGACGATCGGTAGCTGGTCTGAGAGGACGAT<br>CAGCCACACTGGGACTGAGACACGGCCAGACTCCTACGGGAGGCAGCAGTGGG<br>GAATTTCCGCAATGGGCGAAAGCCTGACGGAGCAAGACCGCGTGGGAAGAAG<br>GCTCTTGGGTGTAAACCCCTTTTCTCTGGGAAGAAAGTTGTGAAAGCAGCCTGAC<br>GGTACCAGGGGAATCAGCATCGGCTAACTCCGTGCCAGCCGCCCGCTAAT | Uncultured bacterium clone GB7N87004INZPF,<br>#HM731084, 99%<br><i>Phormidium</i> sp. JR20<br>#KT753321, 98%                                        | Antarctic Peninsula<br><br>Antarctica |
| OTU_2 | GAATCTGCCTTCAGGTGGGGACAACAGTTGGAAACGACTGCTAATACCCAATGTG<br>CCGTGAGGTGAAAGCTTTAGTGCTGAGGATGAGCTCGCTCTGATTAGCTAGTTG<br>GTGGGTAATGGCTACCAAGGCGACGATCAGTAGCTGGTCTGAGAGGATGATCA<br>GCCACACTGGGACTGAGACACGGCCAGACTCCTACGGGAGGCAGCAGTGGGA<br>ATTTTCCGCAATGGGCGCAAGCCTGACGGAGCAAGACCGCGTGAGGGAGGAAG<br>CTCTTGGGTCGTAACCTCTTTTATCTGGAAGAAGATCTGACGGTACCTGATGAA<br>TCAGCATCGGCTAACTCCGTGCCAGCAGCCGCCCGCTAAT             | Uncultured cyanobacterium ADJ921,<br>#HQ230219.1, 99%<br><i>Leptolyngbya</i> sp. CENA375,<br>#KR137596, 99%                                         | High Arctic<br><br>Brazil             |
| OTU_3 | GAATCTGCCTTCAGGTGGGGACAACCACTGGAACCGTGGCTAATACCGAATGT<br>GCAGAGATGTGAAATATTTATAGCCTGAAGATGAGCTCGCTCTGATTAGCTAGTA<br>GGTGTGGTAAAGCGCACCTAGGCGACGATCAGTAGCTGGTCTGAGAGGATGATC<br>AGCCACACTGGGACTGAGACACGGCCAGACTCCTACGGGAGGCAGCAGTGGG<br>AATTTTCCGCAATGGGCGAAAGCCTGACGGAGCAATACCGCGTGAGGGAGGAAG<br>GCTCTTGGGTGTAAACCTCTTTTCTCAGGGAAGAAATCTTGACGGTACCTGAGGA<br>ATAAGCATCGGCTAACTCCGTGCCAGCAGCCGCCCGTAACT          | <i>Tolypothrix</i> sp. NIES-515,<br>#LC215279, 99%<br>Uncultured cyanobacterium,<br>#JX887893.1, 99%                                                | Japan<br><br>Arctic                   |
| OTU_4 | GAATCTACCATCAGGTCTGGGACAACCACTGGAACGCTGGCTAATACCATGATGT<br>GCCGAAAGGTGAAAGGTTAACTGCCTGTTGATGAGCTCGCTCTGATTAGCTAGTT<br>GGTAGAGTAAGAGCCTACCAAGGCGACGATCAGTAGCTGGTCTGAGAGGACGATC<br>AGCCACACTGGGACTGAGACACGGCCAGACTCCTACGGGAGGCAGCAGTGGG<br>AATTTTCCGCAATGGGCGAAAGCCTGACGGAGCAATACCGCGTGAGGGAGGAAG<br>GCTCTTGGGTCGTAACCTCTTTTCTCAGGGAAGAACACAATGACGGTACCTGAGG<br>AATAAGCATCGGCTGACTCCGTGCCAGCCGCCCGCTAAT         | <i>Nostoc pruniforme</i> SAG 62.79,<br>#KM019941, 99%<br>Uncultured cyanobacterium,<br>#JX887892.1, 99%                                             | Denmark<br><br>Arctic                 |
| OTU_5 | GAATCTGCCTTCAGGTCTGGGACAACCACTGGAACCGTGGCTAATACCGGATGT<br>GCCGAGAGGTGAAAGGTTAACTGCCTGAAGATGAGCTCGCTCTGATTAGCTAGTT<br>GGCAGTGTAAGAGACTACCAAGGCGACGATCAGTAGCTGGTCTGAGAGGATGATC<br>AGCCACACTGGGACTGAGACACGGCCAGACTCCTACGGGAGGCAGCAGTGGG<br>AATTTTCCGCAATGGGCGAAAGCCTGACGGAGCAATACCGCGTGAGGGAGGAAG<br>GCTCTTGGGTCGTAACCTCTTTTCTCAGGGAAGAACACAATGACGGTACCTGAGG<br>AATAAGCATCGGCTAACTCCGTGCCAGCCGCCCGCTAAT          | <i>Nostoc</i> sp. <i>Fuscopannaria pacifica</i> UK179<br>cyanobiont, #KF359683, 99%<br>Uncultured <i>Nostoc</i> sp. clone K_S45,<br>#JQ007765.1 99% | Chile<br><br>Scotland                 |
| OTU_6 | GAATCTGCCTATAGGTGGGGACAACAGTTGGAAACAATTGCTAATACCCAATGTG<br>CCGAGAGGTGAAAGCTTTAGTGCTGTAGATGAGCTCGCTCCGATTAGCTAGTTG<br>GTTGGGTAATGGCTGACCAAGGCGACGATCGGTAGCTGGTCTGAGAGGATGATCA<br>GCCACACTGGGACTGAGACACGGCCAGACTCCTACGGGAGGCAGCAGTGGGA<br>ATTTTCCGCAATGGGCGAAAGCCTGACGGAGCAATACCGCGTGCGGGACGAAGGC<br>TTTTGGGTCGTAACCCGCTTTTGTAGGGAAGAAGAACTGACGGTACCTAACGAAT<br>CAGCATCGGCTAACTCCGTGCCAGCAGCCGCCCGTAACT         | Uncultured cyanobacterium<br>#JX887887.1, 99%<br>Cyanobacterium cCLA-17<br>#HQ230228, 98%                                                           | Arctic<br><br>High Arctic             |

Table S5: PCR conditions and primers.

| Primer     | Gene        | Sequence                     | T <sub>m</sub> | Reference             |
|------------|-------------|------------------------------|----------------|-----------------------|
| 27F        | 16S<br>rRNA | AGAGTTTGATCCTGGCTCAG         | 54°C*          | (1)                   |
| 809R       | 16S<br>rRNA | GCTTCGGCACGGCTCGGGTCGATA     |                |                       |
| HEPF       | <i>mcyE</i> | TTTGGGGTTAACTTTTTTGGGCATAGTC | 60°C /         | (1)                   |
| HEPR       | <i>mcyE</i> | AATTCTTGAGGCTGTAAATCGGGTTT   | 56°C*          |                       |
| FAA        | <i>mcyB</i> | CTATGTTATTTATACATCAGG        | 48°C           | (2)                   |
| RAA        | <i>mcyB</i> | CTCAGCTTAACTTGATTATC         |                |                       |
| MTF<br>mod | <i>NRPS</i> | GCNGGDGGRCNTAYGTNCC          | 54°C           | modified after<br>(2) |
| MTR<br>mod | <i>NRPS</i> | CCNCGAAATYTTRACYTG           |                |                       |
| DKF        | PKS         | GTGCCGGTNCCRTGNNGYYTC        | 61.5°C         | (3)                   |
| DKR        | PKS         | GCGATGGAYCCNCARCARMG         |                |                       |
| Cyl M13    | <i>cyrB</i> | GGCAAATTGTGATAGCCACGAGC      | 50°C*          | (4)                   |
| Cyl M14    | <i>cyrB</i> | GATGGAACATCGCTCACTGGTG       |                |                       |
| sxtaF      | <i>sxtA</i> | GCGTACATCCAAGCTGGACTCG       | 62.0°C         | (5)                   |
| sxtaR      | <i>sxtA</i> | GTAGTCCAGCTAAGGCACTTGC       |                |                       |

\*PCR using iTaq™ PCR Master Mix solution (iNtRON Biotechnology, Korea), all other reactions using Phusion Master Mix

1. Jungblut, A.D.; Neilan, B.A. Molecular identification and evolution of the cyclic peptide hepatotoxins, microcystin and nodularin, synthetase genes in three orders of cyanobacteria. *Arch. Microbiol.* **2006**, *185*, 107–114.
2. Neilan, B.A.; Dittmann, E.; Rouhiainen, L.; Bass, R.A.; Schaub, V.; Sivonen, K.; Börner, T. Nonribosomal Peptide Synthesis and Toxicity of Cyanobacteria. *J. Bacteriol.* **1999**, *181*, 4089–4097.
3. Moffitt, M.C.; Neilan, B.A. Evolutionary affiliations within the superfamily of ketosynthases reflect complex pathway associations. *J. Mol. Evol.* **2003**, *56*, 446–457.
4. Schembri, M.A.; Neilan, B.A.; Saint, C.P. Identification of genes implicated in toxin production in the cyanobacterium *Cylindrospermopsis raciborskii*. *Environ. Toxicol.* **2001**, *16*, 413–421.
5. Ballot, A.; Fastner, J.; Wiedner, C. Paralytic shellfish poisoning toxin-producing cyanobacterium *Aphanizomenon gracile* in Northeast Germany. *Appl. Environ. Microbiol.* **2010**, *76*, 1173–1180.
